1 **Inhibition of TRPV4 rescues circuit and social deficits unmasked by acute**  
2 **inflammatory response in a Shank3 mouse model of Autism**

3

4 Stamatina Tzanoulinou<sup>1,2,5</sup>, Stefano Musardo<sup>1,2</sup>, Alessandro Contestabile<sup>1,2</sup>,  
5 Sebastiano Bariselli<sup>1</sup>, Giulia Casarotto<sup>1</sup>, Elia Magrinelli<sup>1</sup>, Yong-hui Jiang<sup>3</sup>, Denis  
6 Jabaudon<sup>1</sup> & Camilla Bellone<sup>1, 4</sup>.

7

8 (1) Department of Fundamental Neuroscience, CMU, University of Geneva, Geneva,  
9 Switzerland.

10 (2) Equal contribution.

11 (3) Department of Pediatrics, Duke University, Durham, North Carolina 27710, USA

12 (4) Correspondence ([camilla.bellone@unige.ch](mailto:camilla.bellone@unige.ch)).

13 (5) Current address: Department of Biomedical Sciences (DSB), FBM, University of  
14 Lausanne, Lausanne, Switzerland.

15

16

17 **Keywords:** social preference, Shank3, TRPV4, nucleus accumbens, D1R MSN, acute  
18 inflammation.

19

20 **Text pages**

21 Words: 3501 total words (without abstract, materials and methods (2488 words),  
22 references, figure legends), abstract (160 words), introduction (532 words), results  
23 (1915 words), discussion (1054 words).

1 **Abstract**

2 Autism spectrum disorder is a neurodevelopmental disease characterized by  
3 social deficits and repetitive behaviors. The high heterogeneity of the disease may be  
4 explained by gene and environmental interactions and potential risk factors include  
5 immune dysfunctions and immune-mediated co-morbidities. Mutations in the *SHANK3*  
6 gene have been recognized as a genetic risk factor for ASD. While heterozygous  
7 *SHANK3* mutations are usually the types of mutations associated with idiopathic  
8 autism in patients, heterozygous deletion of *Shank3* gene in mice does not commonly  
9 induce ASD-related behavioural deficit. Here, we used *in-vivo* and *ex-vivo* approaches  
10 to demonstrate that region-specific neonatal downregulation of *Shank3* in the NAc  
11 promotes D1R-MSN hyperexcitability and upregulates *Trpv4* to impair social  
12 behaviour. Interestingly, genetically vulnerable *Shank3<sup>+/-</sup>* mice, when challenged with  
13 Lipopolysaccharide to induce inflammatory response, showed similar circuit and  
14 behavioural alterations that were rescued by acute *Trpv4* inhibition. Altogether our  
15 data demonstrate shared molecular and circuit mechanisms between ASD-relevant  
16 genetic alterations and environmental insults, which ultimately lead to sociability  
17 dysfunctions.

## 1 Introduction

2 Autism spectrum disorder (ASD) includes a heterogeneous group of  
3 neurodevelopmental diseases characterized by social communication deficits and  
4 repetitive behaviours. Mutations in *SHANK3* gene, coding for a scaffolding protein  
5 located at excitatory synapses, account for 1-2% of all ASD cases and its haplo-  
6 insufficiency is acknowledged to lead to a high-penetrance form of ASD, known as  
7 Phelan-McDermid syndrome<sup>1,2</sup>. Currently, the development of pharmacological  
8 interventions to alleviate ASD-related sociability symptoms is limited by several  
9 factors, including the relative lack of understanding of the genetic consequences of  
10 *SHANK3* insufficiency. This is further complicated by the fact that Shank3 plays  
11 specific roles depending on its expression pattern in different regions and cell types<sup>3</sup>.  
12 Thus, investigating altered neuronal circuit mechanisms underlying disease  
13 pathophysiology and uncovering their roles in discrete behavioral readouts in mice is  
14 of the highest importance<sup>4,5</sup>.

15  
16 Most of the pre-clinical models of *Shank3* deficiency show impairments in  
17 dorsal striatal circuits<sup>3,6</sup>, principally related to the indirect pathway, which drives  
18 repetitive behaviour<sup>6,7</sup>. On the other hand, the role of the mesolimbic reward system,  
19 including the Ventral Tegmental Area<sup>8</sup> and the Nucleus Accumbens (NAc)<sup>9</sup>, in social  
20 reward processing makes it an ideal neural circuit substrate for further investigation  
21 in the context of ASD in both rodents<sup>10</sup> and humans<sup>11,12</sup>. Despite the fact that  
22 neuronal deficits within the reward system have been revealed in different *Shank3*  
23 animal models<sup>13,14</sup> and that expression of Shank3 in the striatum is particularly  
24 enriched<sup>15</sup>, the contribution of *Shank3* insufficiency in the ventral striatum, which  
25 includes the Nucleus Accumbens (NAc), to ASD symptomatology has been largely  
26 neglected.

27  
28 Although the generation of knock-out (KO) *Shank3* (*Shank3*<sup>-/-</sup>) mouse lines  
29 has favored the identification of behavioural and synaptic impairments, single allele  
30 mutations minimally affect the behavioural pattern in rodents<sup>16-19</sup> limiting translation  
31 from rodents to human studies. Indeed, while Phelan-McDermid syndrome (PMS)  
32 patients are heterozygous for *SHANK3* deletions or mutations, most of the existing

1 animal models failed to report consistent behavioural phenotypes when heterozygote  
2 mice were assessed. Thus, one intriguing question that arises is whether  
3 environmental challenges would actually exacerbate or unmask alterations,  
4 otherwise covert in heterozygote mice. Indeed, apart from genetic risk factors,  
5 several studies support the role of immune regulation and inflammation in ASD.  
6 Patients have frequent immune dysfunctions and immune-mediated co-morbidities<sup>20</sup>.  
7 Furthermore, transcriptomic analysis in post-mortem brain tissues revealed an  
8 upregulation of genes involved in inflammation <sup>21</sup>, while in recent years, an interplay  
9 between immune system and reward circuit function has been put forward<sup>22,23</sup>.  
10 Remarkably, in some PMS patients, debilitating symptoms appeared after acute  
11 infections or stressful environmental challenges <sup>24</sup> suggesting that the heterogeneity  
12 in the phenotypes could be the consequence of the interplay between genetic and  
13 environmental factors. Although increasing evidence indicates links between immune  
14 deficits and ASD, mechanistic insights are still lacking.

15  
16 Here we firstly interrogated behavioural and electrophysiological  
17 consequences of shRNA-induced *Shank3* early postnatal downregulation in the NAc.  
18 Not only we observed reduced social preference and D1-medium spiny neurons (D1-  
19 MSNs) hyperexcitability, but also identified the Transient Receptor Potential Vanilloid  
20 4 (Trpv4) as a key effector of our observations. Remarkably, similar molecular, circuit  
21 and behavioural alterations were also observed in genetically vulnerable *Shank3*<sup>+/-</sup>  
22 mice challenged with lipopolysaccharide-induced neuroinflammation. Finally, acute  
23 Trpv4 inhibition in the NAc restored excitability and sociability deficits in *Shank3*  
24 heterozygous mice.

## 1 RESULTS

2

### 3 **Social deficits following early NAc-specific *Shank3* insufficiency**

4        Given the emerging importance of NAc in social reward processing<sup>9,25</sup>, we first  
5 focused our investigation on this brain circuit and asked whether *Shank3*  
6 downregulation restricted to this region would lead to sociability deficits. Using AAV-  
7 sh*Shank3*-luczsGreen virus, we downregulated the expression of *Shank3* during early  
8 postnatal development<sup>13,26</sup> ( $\leq$ P6; hereafter P6 for simplicity, **Fig. 1a-a'** and  
9 **Supplementary figure 1a-b**) or during adulthood (P90, **Fig. 1d-d'**, and  
10 **Supplementary figure 1a-b**). While scr*Shank3* mice (injected at the same age with a  
11 scrambled virus) showed preference for a juvenile conspecific (**Fig. 1b** and **1e**),  
12 sh*Shank3* P6-injected mice spent a comparable amount of time around the juvenile  
13 and object stimulus (**Fig. 1c**) and in the two chambers (**Supplementary figure 1c**).  
14 Furthermore, while the overall exploratory behaviour was comparable between  
15 scr*Shank3* and sh*Shank3* mice (**Supplementary figure 1d** and **g**), sh*Shank3*-infected  
16 mice spent less time exploring the juvenile mouse and more time exploring the object  
17 stimulus compared to scr*Shank3* (**Supplementary figure 1e-f**). Remarkably, when  
18 sh*Shank3* was injected at P90, mice showed intact sociability (**Fig. 1f** and  
19 **Supplementary figure 1h**) while presenting similar decrease in *Shank3* expression  
20 (**Supplementary figure 1b**). No difference in the exploration time around targets  
21 between groups (**Supplementary figure 1i-k**), nor in the distance moved  
22 (**Supplementary figure 1l**) was observed after injection at P90.

23        Altogether these data point at the NAc as a key region for sociability deficits  
24 induced by *Shank3* insufficiency. Moreover, our results suggest the existence of a  
25 critical period during early postnatal development, which is important for the  
26 expression of appropriate sociability later in life. We, thus, decided to focus our efforts  
27 on early *Shank3* downregulation and to investigate the mechanisms underlying  
28 sociability deficits.

29

### 30 **Alterations in intrinsic properties of NAc D1R-expressing Medium Spiny** 31 **Neurons following *Shank3* downregulation**

1           The downregulation of Shank3 from D1R-expressing (direct pathway) or D2R-  
2           expressing MSNs of dorsal striatum (indirect pathway) leads to neuronal  
3           hyperexcitability<sup>3</sup>. In order to assess the excitability of MSN subpopulations in the NAc  
4           in our model, we used fluorescently-labelled D1R mice (*Drd1a*-tdTomato)<sup>27</sup> injected  
5           with *scrShank3* or *shShank3* (**Fig. 2a-a'**). When recorded in presence of synaptic  
6           blockers (picrotoxin and kynurenic acid), *Shank3* downregulation increased the  
7           excitability of D1R-tom<sup>+</sup> compared to *scrShank3*::D1R-tom<sup>+</sup> MSNs, while no changes  
8           were detected in the D1R-tom<sup>-</sup> population (**Fig. 2b-e** and **Supplementary figure 2a-**  
9           **f**). Interestingly, in absence of synaptic blockers, *Shank3* downregulation induced a  
10          hyperexcitability of D1R-tom<sup>+</sup> MSNs and hypoexcitability of D1R-tom<sup>-</sup> MSNs,  
11          (**Supplementary figure 2g-r**). Overall, these results indicate that the hyperexcitability  
12          of accumbal direct pathway MSNs largely derives from alterations of intrinsic  
13          membrane properties, while the hypoexcitability of putative indirect pathway MSNs is  
14          the consequence of circuit network dysfunctions.

15

### 16 **A causal link between NAc D1R MSN hyperexcitability and sociability deficits**

17          To probe causality between direct pathway hyperexcitability and sociability  
18          deficits, we used cell-specific chemogenetic tools to manipulate neuronal activity.  
19          D1R:Cre<sup>+</sup> or D1R:Cre<sup>-</sup> mice were injected with either control scrambled virus or  
20          *shShank3* during early post-natal development. After P30, all mice were infected with  
21          an inhibitory Cre-dependent DREADD-expressing virus (AAV-DIO-hM4Di-mCherry)  
22          (**Fig. 2f-f'**). We validated the effectiveness of our chemogenetic approach by analyzing  
23          the expression of GIRK channels in Nac MSN (**Supplementary figure 3a**) the main  
24          effectors of chemogenetic inhibition, and the effects of Clozapine N-Oxide (CNO) on  
25          neuronal excitability *ex vivo* (**Supplementary figure 3b-c**). Mice underwent the three-  
26          chamber interaction assay 30 minutes after systemic CNO injections (**Fig. 2f-f'**).  
27          D1R:Cre<sup>+</sup> mice injected with CNO (regardless of NAc virus) reduced their locomotor  
28          activity (**Supplementary figure 3d**); however, the total exploration time for both  
29          enclosures remained comparable to that of D1R:Cre<sup>-</sup> mice (**Supplementary figure**  
30          **3e**). By analysing the time spent around either the juvenile or object target, we  
31          confirmed that control D1R:Cre<sup>+</sup>::*scrShank3* mice showed intact sociability (**Fig. 2g,**  
32          **Supplementary figure 3f**). While both D1R:Cre<sup>+</sup>::*scrShank3* mice treated with CNO

1 and D1R:Cre<sup>+</sup>::sh*Shank3* did not show a preference for the social over the object  
2 stimulus (**Fig. 2h-i and Supplementary figure 3f**), interestingly, D1R:Cre<sup>+</sup>::sh*Shank3*  
3 showed a preference for the social stimulus compared to the object (**Fig. 2j and**  
4 **Supplementary figure 3f**).

5 These data establish a causal link between NAc D1R-MSN hyperexcitability  
6 and sociability defects *in vivo*, and further suggest that decreasing direct pathway  
7 hyperexcitability might be a useful strategy to ameliorate social dysfunctions.

8

### 9 **Downregulation of *Shank3* induces a *Trpv4* upregulation**

10 It has been previously shown that *Shank3* mutations in human predispose to  
11 autism by inducing a channelopathy<sup>28</sup>. To further investigate the mechanisms  
12 underlying D1-MSN hyperexcitability, we performed direct pathway transcriptomic  
13 analysis of the NAc in *Drd1a*-tdTomato P6-injected *scrShank3* and *shShank3* mice.  
14 For this purpose, we FAC-sorted direct pathway MSNs at P30 and performed bulk  
15 RNA sequencing (**Fig. 3a**). *ScrShank3* and *shShank3* were clustered separately in  
16 both D1R-tom<sup>+</sup> and D1R-tom<sup>-</sup> populations, (**Fig. 3b**) and differential expression  
17 analysis by groups for *scrShank3* vs *shShank3* revealed 178 altered genes in AAV-  
18 infected D1R-tom<sup>+</sup> (**Fig. 3c and Supplementary figure 4a**). GO:Term analysis of  
19 significantly altered genes in NAc-injected *shShank3* mice, highlighted changes  
20 relevant to cell adhesion, localization, and cellular movement-related, as well as,  
21 related to functions regarding inflammatory mechanisms (**Fig. 3d**). Moreover, within  
22 the modified genes identified in the bulk RNA sequencing, we observed a high  
23 representation of activity-related genes (**Fig. 3e**) in D1R-tom<sup>+</sup> neurons, immune  
24 response-related genes, as well as, SFARI genes associated with ASD in both D1R-  
25 tom<sup>+</sup> and D1R-tom<sup>-</sup> populations (**Supplementary figure 4b-c**).

26 Among these genes altered by early postnatal *Shank3* downregulation, we  
27 noticed that the one encoding for the Transient receptor potential vanilloid 4 (*Trpv4*)  
28 channel was significantly upregulated (**Fig. 3e**). *Trpv4* is a member of the transient  
29 receptor potential superfamily, broadly expressed in the central nervous system<sup>29</sup>.  
30 These receptors are activated by temperature, mechanical stimulation, cell swelling  
31 and endocannabinoids<sup>30</sup> and participate in inflammatory responses<sup>31</sup>. Moreover,  
32 *Trpv4* function influences neuronal excitability and its disruption leads to social

1 behaviour abnormalities<sup>32</sup>. The increased in *Trpv4* expression in the NAc from mice  
2 where *Shank3* was downregulated before P6, was confirmed by qPCR  
3 (**Supplementary figure 5a**). Remarkably, when *Shank3* was downregulated during  
4 adulthood, the levels of *Trpv4* were comparable between scr*Shank3* and sh*Shank3*  
5 injected mice (**Supplementary figure 5b**). Since downregulation of *Shank3* in  
6 adulthood did not reveal any sociability deficit (**Fig. 1d-f**), together, these data  
7 suggested a link between the increased *Trpv4* expression and the behavioural  
8 phenotype. To directly interrogate this hypothesis, we tested the ability of a *Trpv4*-  
9 specific inhibitor (HC-067047) to rescue the direct pathway MSN hyperexcitability *ex*-  
10 *vivo* (**Fig. 3f**). In patch-clamp recordings, bath application of HC-067047 normalized  
11 the excitability of D1R-tom<sup>+</sup>::sh*Shank3* to D1R-tom<sup>+</sup>::scr*Shank3* levels (**Fig. 3g**). So  
12 far, this evidence indicates that early downregulation of *Shank3* in the NAc  
13 upregulates both the expression and the function of *Trpv4* in the direct pathway  
14 neurons, identifying a novel molecular effector of *Shank3* insufficiency.

15

### 16 **Trpv4 antagonist restores sociability in NAc sh*Shank3* mice**

17 To test causality between sociability defects and the upregulation of *Trpv4* in  
18 the NAc and to probe its potential as a therapeutic target *in-vivo*, we next asked  
19 whether the region-specific administration of *Trpv4* inhibitor restores sociability in  
20 sh*Shank3* mice. Scr*Shank3* and sh*Shank3* were bilaterally cannulated above the  
21 NAc for local pharmacology experiments. After one week of recovery, sh*Shank3* mice  
22 were pre-treated with HC-067047 or vehicle before the three-chamber test (**Fig. 3h-**  
23 **h'**). Treatments were counterbalanced and the same animals were tested again after  
24 seven days (scr*Shank3* animals were instead infused only with vehicle). scr*Shank3*  
25 mice infused with vehicle showed intact sociability (**Fig. 3i**) indicating no side effects  
26 of the cannulation on our behavioural endpoints. Confirming our previous findings,  
27 vehicle-infused sh*Shank3* animals showed impaired social preference (**Fig. 3j**).  
28 Remarkably, intra-NAc *Trpv4* antagonist (HC-067047) infusions in sh*Shank3* mice  
29 restored sociability (**Fig. 3k**), increasing the time spent in the social chamber  
30 (**Supplementary figure 5c**). Furthermore, sh*Shank3* mice showed an increase of  
31 social preference ratio when infused with HC-067047 compared to when infused with  
32 vehicle (**Supplementary figure 3l**). No difference was observed in the distance



1 moved during the test among the groups (**Supplementary figure 5d**).

2 Our results highlight the role of *Trpv4* both in D1R-MSN hyperexcitability and  
3 social preference deficits displayed by NAc-injected *shShank3* mice.

#### 5 **LPS challenge unmask social deficits in *Shank3*<sup>+/-</sup> mice**

6 Based on the region-specific results obtained by GO:Term analysis (**Fig. 3d**),  
7 we hypothesised that acute inflammatory challenge could unmask behavioural  
8 deficits of *Shank3* knock-out mice, in which exons 4 to 22 were deleted ( $\Delta e4-22^{+/-}$   
9 mice, hereafter referred to as *Shank3*<sup>+/-</sup>)<sup>19</sup>, via a *Trpv4*-dependent mechanism. As  
10 previously reported<sup>19</sup>, *Shank3*<sup>+/-</sup> mice do not display social preference deficits in the  
11 three-chamber test (**Supplementary figure 6a-e**). Importantly, when  
12 Lipopolysaccharide (LPS) was injected 24 hrs prior the three-chamber task (**Fig. 4a**),  
13 *Shank3*<sup>+/-</sup> mice spent a comparable amount of time around the juvenile and object  
14 stimulus and in the corresponding chamber, indicating sociability deficits (**Fig. 4e** and  
15 **Supplementary figure 7a**). As control, saline-injected *Shank3*<sup>+/+</sup> and *Shank3*<sup>+/-</sup> mice  
16 spent more time exploring the juvenile-containing enclosure and chamber (**Fig. 4b**  
17 and **d** and **Supplementary figure 7a**). Moreover, LPS challenge did not confer any  
18 behavioural alterations in *Shank3*<sup>+/+</sup> mice (**Fig. 4c** and **Supplementary figure 7a**)  
19 and the distance moved did not differ across genotypes (**Supplementary figure 7b**).  
20 Importantly, sociability deficits were not observed 7 days after LPS injection (**Fig. 4f-**  
21 **h** and **Supplementary figure 7c-d**) indicating that alterations induced by acute  
22 inflammatory challenges were transient.

23 We next asked whether striatal *Trpv4* expression was altered in *Shank3*<sup>+/-</sup>  
24 mice after LPS. Remarkably, whereas LPS injections increased the inflammatory  
25 markers IL-1 $\beta$  and TNF- $\alpha$  expression 24 hours after LPS injection in both *Shank3*<sup>+/+</sup>  
26 and *Shank3*<sup>+/-</sup> mice, the observed increase in *Trpv4* was seen only in *Shank3*<sup>+/-</sup> mice  
27 and not detectable 7 days after LPS challenge (**Fig. 4i-j**).

28 These data supported the hypothesis that inflammatory challenges may  
29 unmask behavioural phenotypes in *Shank3*<sup>+/-</sup> mice via an upregulation of *Trpv4* in the  
30 striatum.

31  
32 **Hyperexcitability seen in D1R-MSNs of *Shank3*<sup>+/-</sup> mice after an acute LPS**

## 1 **challenged is rescued by Trpv4 antagonist *ex-vivo***

2 To further investigate our hypothesis, we crossed *Shank3<sup>+/-</sup>* with *Drd1a-tdTomato*  
3 mice and we performed *ex-vivo* patch-clamp recordings from D1R-MSNs 24 hrs after LPS  
4 injection (**Fig 4k**). In order to probe the functional consequences of *Trpv4* upregulation, we  
5 first assessed *Trpv4*-mediated whole-cell currents from D1R-MSNs and observed an  
6 increase only in LPS-challenged *Shank3<sup>+/-</sup>* mice (**Fig 4l**). Importantly, we found that LPS  
7 challenge caused a D1R-MSNs hyperexcitability in *Shank3<sup>+/-</sup>* mice similarly to the NAc-  
8 *shShank3* model (**Fig 4m-n**). Finally, bath application of *Trpv4* antagonist, HC-  
9 067047, normalized neuronal excitability, strengthening the causal links between  
10 D1R-MSN hyperexcitability and *Trpv4* upregulation (**Fig 4m-n**).

11

## 12 **Intra-NAc *Trpv4* antagonist restores sociability in *Shank3<sup>+/-</sup>* LPS-challenged** 13 **mice**

14 Although these results further corroborated our hypothesis, we still questioned  
15 whether the NAc plays a role in the behavioural alterations observed in *Shank3<sup>+/-</sup>*  
16 mice after LPS injection.

17 To answer this question, *Shank3<sup>+/-</sup>* mice were bilaterally cannulated above the  
18 NAc for local pharmacology experiments. After one week of recovery, mice were  
19 treated with either HC-067047 or vehicle intra-NAc infusions 1 hour after the LPS  
20 challenge. The day after, mice were again infused locally in the NAc with HC-067047  
21 or vehicle 30 minutes before the three-chamber task (**Fig. 5a**). While *Shank3<sup>+/-</sup>*::LPS  
22 mice infused with vehicle showed sociability deficits (**Fig. 5b** and **Supplementary**  
23 **figure 8a**), *Shank3<sup>+/-</sup>*::LPS mice infused with HC-067047 spent more time around the  
24 enclosure containing the juvenile mouse (**Fig. 5c**), albeit without a significant  
25 difference in the time spent in chambers (**Supplementary figure 8a**). Locomotor  
26 activity was not affected by local HC-067047 treatment (**Supplementary figure 8b**).  
27 These results indicate that the inhibition of *Trpv4* in the NAc after immune system  
28 activation is sufficient to ameliorate sociability deficits, suggesting a link between  
29 *Trpv4* modulation and social behaviour.

30 Collectively, our data highlight the NAc *Trpv4* alterations as a potentially  
31 common and unifying molecular underlying factor in sociability and aberrant intrinsic  
32 neuronal properties in *Shank3* mouse models for autism.

## 1 DISCUSSION

2 Mutations in the *SHANK3* gene have been recognized as a genetic risk factor  
3 for ASD. Remarkably, high heterogeneity of neuronal pathophysiology and behavioral  
4 phenotypes have been reported in *Shank3* mouse models. Nevertheless, whether  
5 environmental factors contribute to the phenotypic heterogeneity of *Shank3* mouse  
6 model is still largely unknown. Here we first found that early loss of *Shank3* in the Nac  
7 reduces sociability via direct pathway hyperexcitability. These changes were  
8 accompanied by an unbalance of inflammatory mediators and by the overexpression  
9 of transient receptor potential vanilloid 4 (*Trpv4*). Interestingly, lipopolysaccharide-  
10 induced neuroinflammation revealed similar molecular, circuit and behavioural  
11 alterations in genetically vulnerable *Shank3*<sup>+/-</sup> mice. Acute *Trpv4* inhibition in the NAc  
12 restored excitability and sociability deficits. Our data not only suggest that activation  
13 of the immune system may unmask autism-related behavioural phenotypes in  
14 genetically vulnerable mice but also ascribe *Trpv4* as a potential therapeutic target for  
15 sociability defects in Autism.

16

17 The mesolimbic system represents an interesting hub for ASD  
18 pathophysiology. Indeed, human studies reported that social stimuli activate the  
19 NAc<sup>35-39</sup> and that this activation is disrupted in ASD patients<sup>11,40</sup>. In support of the  
20 clinical studies, alterations in the mesolimbic system induce reward-related  
21 behavioural alterations in rodents<sup>8,13,41</sup>. However, the neuronal mechanisms  
22 underlying NAc-related sociability deficits remained largely unknown. It has been  
23 previously shown that the lack of *Shank3* induces differential alterations of intrinsic  
24 and synaptic properties of dorsolateral striatum D1R- and D2R-MSNs and that  
25 deficits in the indirect pathway contribute to repetitive behaviour<sup>3,6</sup>. In our study, we  
26 found that the downregulation of *Shank3* in the ventral striatum alters sociability via  
27 hyperexcitability of D1R-MSNs, which is linked to gene expression alterations. While  
28 we cannot exclude that changes in D2R-MSNs also contribute to the phenotype, it is  
29 important to note that changes in excitability in the indirect pathway neurons were  
30 only observed in absence of synaptic blockers. Furthermore, while decreasing the  
31 activity of D1R-MSNs in *shShank3* mice was able to rescue the behavioural  
32 phenotype, decreasing the activity of the direct pathway neurons in control mice

1 alters sociability (**Fig. 2h**). These data not only causally link the activity of the direct  
2 pathway ventral striatum to sociability but suggest that the activity of D1R-MSN has  
3 to be tightly tuned in order to guarantee optimal expression of social behaviour.  
4 These findings are in line with previous evidence supporting the importance of NAc  
5 D1R-MSNs activity in modulating social behavior<sup>25</sup>.

6  
7 Although ASD is known as a synaptic pathology<sup>46,47</sup>, recent evidence  
8 demonstrated a fundamental role of ion channels deficits in the pathophysiology of  
9 ASDs. Indeed, the loss of scaffolding between Shank3 and HCN impairs Ih currents  
10 and neuronal excitability<sup>28</sup>. Here, we highlighted a novel link between Trpv4  
11 alterations and Shank3 insufficiency. We found that accumbal *Shank3* insufficiency  
12 upregulates *Trpv4*, a non-selective cation channel constitutively active at  
13 physiological temperatures<sup>42</sup>, which allows Ca<sup>2+</sup> influx, stimulates Ca<sup>2+</sup>-induced Ca<sup>2+</sup>-  
14 release (CICR) signaling<sup>43–45</sup> and ultimately tunes neuronal excitability<sup>42</sup>.  
15 Interestingly, we have not observed an upregulation of *Trpv4* in P90-injected  
16 sh*Shank3* mice. To further prove the causal link between the gene and behaviour,  
17 we observed an increase in Trpv4 expression in *Shank3*<sup>+/-</sup> mice 24 hrs after LPS,  
18 time point at which we also could observe behavioural deficits. Furthermore,  
19 sociability of sh*Shank3* and LPS-*Shank3*<sup>+/-</sup> mice improves by a region-specific Trpv4  
20 inhibition. Although future experiments will have to determine the precise  
21 mechanisms of how a scaffold protein could affect the transcription of a set of genes,  
22 our study supports the idea that *Shank3* downregulation affects both intrinsic  
23 excitability and synaptic properties, which may ultimately account for the symptom  
24 heterogeneity of PMS patients.

25  
26 The heterogeneity of ASD symptoms most likely results from the involvement  
27 of a multitude of genetic factors and a complex interaction between those genes and  
28 environmental challenges<sup>48–53</sup>. For example, increasing evidence suggests a role for  
29 inflammation in ASD pathogenesis<sup>54–56</sup>. Indeed, individuals with ASD often have  
30 heightened levels of pro-inflammatory cytokines<sup>57,58</sup>, and post mortem brain samples  
31 revealed an upregulation of genes related to the immune response<sup>59</sup>. A recent  
32 hypothesis posits that the activation of the immune system during critical periods of

1 brain development may cause neuronal dysfunctions<sup>60,61</sup> and lead to behavioural  
2 deficits<sup>62</sup>. To better understand how immune responses to infectious agents might  
3 affect behavior in preclinical models, we used LPS, a bacterial endotoxin, that  
4 stimulates an innate response to bacterial infection leading to a variety of behavioural  
5 changes<sup>63–68</sup>. Interestingly, animals exposed to inflammatory stimuli show impaired  
6 motivation, decreased exploratory behaviour<sup>69</sup>, and social withdrawal<sup>70,71</sup>. Here, we  
7 show that one LPS injection during adulthood reveals transient sociability deficits in  
8 adult *Shank3*<sup>+/-</sup> mice. Our data suggest that immune system activation may expose  
9 an underlying genetic vulnerability in *Shank3*<sup>+/-</sup> mice, leading to social behavior  
10 deficits.

11

12 Exploring the contribution of striatal dysfunctions to ASD pathophysiology  
13 allowed us to uncover alterations in specific neuronal populations and to find a novel  
14 potential therapeutic target. Specifically, using a circuit-specific knock-down strategy,  
15 we identified *Trpv4* upregulation as the link between changes in excitability,  
16 inflammatory response and behavioural deficits. *Trpv4* is widely expressed in the  
17 brain where it is activated by changes in both osmotic pressure and heat<sup>72–74</sup>.  
18 Research into the involvement of *Trpv4* in neuropathies and neurodegenerative  
19 diseases has attracted an increasing interest<sup>75,76</sup>. Indeed, whole-genome sequencing  
20 of quartet families with ASD has revealed frameshift mutations of *Trpv4*<sup>77</sup>, suggesting  
21 a possible involvement in the pathogenesis of autism. Furthermore, hyperactivity of  
22 these channels occurs in several pathological conditions<sup>45,76,78,79</sup>. Interestingly, *Trpv4*  
23 activation may induce inflammation by increasing pro-inflammatory cytokines<sup>45,80</sup> and  
24 *Trpv4* inhibitors have been used to counteract oedema and inflammation<sup>31</sup>. Although  
25 it is well established that inflammatory cytokines may impact both synaptic  
26 transmission and neuronal excitability<sup>81,82</sup>, the direct link between *Trpv4*, neuronal  
27 function and behaviour was still relatively unknown. Here, using a circuit approach,  
28 we firstly identify an upregulation of *Trpv4* after *Shank3* downregulation.  
29 Consequently, based on these results, we found that inflammatory challenge in  
30 *Shank3*<sup>+/-</sup> mice increased the expression of *Trpv4* and induced D1R-MSNs  
31 hyperexcitability. By rescuing sociability deficits in these mice, we provide a novel  
32 link between immunoresponse, genetic background, and neuronal activity in the

1 context of ASD. Finally, our data point at Trpv4 channel as a novel potential candidate  
2 for the treatment of ASD symptoms.

3

4 Overall, our data highlight that viral-mediated and region-specific ablation of  
5 *Shank3*, is a suitable model to obtain mechanistic insights regarding regions and cell  
6 types that could be implicated in autism-relevant symptoms and furthermore, to  
7 validate hypotheses and potential novel therapeutic interventions.

8

1 **Authors Contributions**

2 ST, SM, AC and CB conceived and designed the experiments. ST, AC and GC  
3 performed and analyzed the behavioural experiments. ST, SM and SB performed and  
4 analyzed the electrophysiological experiments. EM and DJ analyzed the results  
5 obtained from the bulk RNA sequencing. YJ generated the mutated Shank3 mouse  
6 line. ST, SM, AC and CB wrote the manuscript and AC prepared the figures.

7

8 **Acknowledgments**

9 CB is supported by the Swiss National Science Foundation, Pierre Mercier  
10 Foundation, ERC consolidator grant and NCCR Synapsy. We thank Lorena Jourdain  
11 for technical support.

12

13 **Conflict of interests**

14 The authors declare no conflict of interest.

1 **Figure legends**

2

3 **Figure 1: Downregulation of *Shank3* in the NAc during early postnatal**  
4 **development alters social preference**

5 **(a, d)** Schema of injection sites in the NAc with AAV-scr*Shank3*-GFP or AAV-  
6 sh*Shank3*-luczsGreen in  $\leq$  P6 mice (e) or at P90 (h). **(a', d')** Representative images  
7 of injection sites (scale bar: 500  $\mu$ m). **(b, c, e, f)** Left: time spent around the  
8 enclosures during the social preference test for mice injected at  $\leq$ P6 or at P90 ((b);  $t$   
9  $_{(12)} = 6.092$ ,  $p < 0.001$ , (c);  $t$   $_{(9)} = 0.409$ ,  $p = 0.697$ , (e);  $t$   $_{(9)} = 3.806$ ,  $p = 0.004$ , (f);  $t$   $_{(6)}$   
10  $= 6.970$ ,  $p < 0.001$ ). Right: juvenile preference index for mice injected at  $\leq$  P6 or at  
11 P90 (one-sample t-tests against chance level = 0.5: (b), scr*Shank3*;  $t$   $_{(12)} = 5.847$ ,  $p$   
12  $< 0.001$ , (c), sh*Shank3*;  $t$   $_{(9)} = 0.273$ ,  $p = 0.791$ ; (e), scr*Shank3*;  $t$   $_{(9)} = 3.928$ ,  $p = 0.003$ ,  
13 (f), sh*Shank3*;  $t$   $_{(6)} = 7.996$ ,  $p < 0.001$ ). Error bars report SEM.

14

15 **Figure 2: *Shank3* NAc downregulation alters D1R MSNs excitability.**  
16 **Decreasing the activity of D1R MSNs normalizes sociability deficits**

17 **(a)** Experimental design. Drd1a-dTomato mice were injected neonatally in the NAc  
18 with scr or sh*Shank3* virus and whole-cell patch clamp recordings were performed  
19 during early adulthood. **(a')** Representative images of the NAc of a D1R-  
20 tom+::sh*Shank3* mouse (scale bar: 50  $\mu$ m). **(b)** Example traces at 300 pA  
21 depolarizing current injection in D1R-tom+ MSNs infected with scr*Shank3* (left) or  
22 with sh*Shank3* (right). **(c)** Number of action potentials (nAPs) across increasing  
23 depolarizing current steps (0-500 pA) for D1R-tom+::scr*Shank3* and sh*Shank3*  
24 MSNs, in presence of picrotoxin and kynurenic acid. (Repeated measures ANOVA,  
25 virus main effect  $F_{(1,14)} = 10.88$ ,  $p = 0.005$ , current steps main effect  $F_{(10, 140)} = 7.727$ ,  
26  $p < 0.001$ , scr*Shank3* n = 8 cells, 3 mice, sh*Shank3* n = 8 cells, 3 mice). **(d)** Example  
27 traces at 300 pA depolarizing current injection in D1R-tom- MSNs infected with  
28 scr*Shank3* (left) or with sh*Shank3* (right). **(e)** Number of action potential (nAPs)  
29 across increasing depolarizing current steps (0-500 pA) for D1R-tom-::scr*Shank3*  
30 and sh*Shank3* MSNs, in presence of picrotoxin and kynurenic acid. (Repeated  
31 measure (RM) two-way ANOVA, virus main effect  $F_{(1,18)} = 0.098$ ,  $p = 0.758$ , current  
32 steps main effect  $F_{(10, 180)} = 14.58$ ,  $p < 0.001$ , n = 8 cells, 3 mice (sh), n=12 cells, 3



1 mice (scr). **(f)** Experimental design. D1R-Cre positive (D1R:Cre<sup>+</sup>) and negative  
2 (D1R:Cre<sup>-</sup>) mice were injected neonatally in the NAc with scr or sh*Shank3* virus and  
3 after P30 with AAV-hSyn-DIO-hM4Di-mCherry (DREADD). After 4 weeks, allowing  
4 for virus expression, the mice underwent social behaviour assessment in the three-  
5 chamber task. Mice were intraperitoneally injected with CNO 30 min before starting  
6 the test. **(f')** Representative images of the NAc of a D1R:Cre<sup>+</sup> mouse infected with  
7 sh*Shank3* and DREADD viruses (scale bar: 50  $\mu$ m). **(g, h, i, j)** Left: time around the  
8 target during the social preference test for D1R:Cre<sup>-</sup>::scr*Shank3* mice (g;  $t_{(7)} = 5.453$ ,  
9  $p = 0.001$ ); D1R:Cre<sup>+</sup>::scr*Shank3* mice (h;  $t_{(7)} = 0.471$ ,  $p = 0.652$ ); D1R:Cre<sup>-</sup>  
10 ::sh*Shank3* mice (i;  $t_{(6)} = 0.264$ ,  $p = 0.801$ ) and D1R:Cre<sup>+</sup>::sh*Shank3* mice (j;  $t_{(8)} =$   
11  $3.443$ ,  $p = 0.009$ ). Right: juvenile preference index (one-sample t-tests against  
12 chance level = 0.5: D1R:Cre<sup>-</sup>::scr*Shank3*;  $t_{(7)} = 6.395$ ,  $p < 0.001$ ,  
13 D1R:Cre<sup>+</sup>::scr*Shank3*;  $t_{(7)} = 0.054$ ,  $p = 0.958$ , D1R:Cre<sup>-</sup>::sh*Shank3*;  $t_{(6)} = 0.334$ ,  $p =$   
14  $0.750$ , D1R:Cre<sup>+</sup>::sh*Shank3*;  $t_{(8)} = 3.706$ ,  $p = 0.006$ ). Error bars report SEM.

15

### 16 **Figure 3: Downregulation of *Shank3* in D1R MSNs induces alterations in** 17 **inflammatory mediators and *Trpv4* expression**

18 **(a)** Experimental design. Drd1a-dTomato mice were injected neonatally in the NAc  
19 with scr or sh*Shank3* virus. At P30 NAc was dissected and FACsorted in 4 different  
20 cell populations (D1R-tom<sup>+</sup>, D1R-tom<sup>-</sup>, D1R-tom<sup>+</sup>::AAV and D1R-tom<sup>-</sup>::AAV). For  
21 each cell population we carried out bulk RNA sequencing. **(b)** Worst-case scenario  
22 selected altered genes in scr vs sh testing clearly discriminated infected cells, both  
23 D1R<sup>+</sup> and D1R<sup>-</sup> in PCA analysis. **(c)** While non-infected samples do not share  
24 common genes significantly altered in scr vs sh testing, infected D1R<sup>+</sup> and D1R<sup>-</sup>  
25 share a core set of 68 altered genes. **(d)** Overall GO:Term analysis of infected D1R<sup>+</sup>  
26 significantly altered genes highlights the relevance of inflammatory mechanisms, as  
27 well as cell adhesion-, localization- and movement-related functions. **(e)** D1R-tom<sup>+</sup>  
28 altered genes include genes expressing proteins directly involved in  
29 electrophysiological properties, including the Transient receptor potential vanilloid 4  
30 (*Trpv4*). **(f)** Experimental design. Drd1a-dTomato mice were injected neonatally in  
31 the NAc with scr or sh*Shank3* virus and whole-cell patch clamp recordings were  
32 performed during early adulthood. **(g)** Right: example traces from 300 pA

1 depolarizing current injection in D1R+ MSNs infected with *scrShank3* treated with  
2 vehicle (up), D1R+ MSNs infected with *shShank3* treated with vehicle (middle) and  
3 D1R+ MSNs infected with *shShank3* treated with HC-067047 (down). Left: number  
4 of action potentials (nAPs) across increasing depolarizing current steps (0-500 pA)  
5 for D1R-tom+::*scrShank3* and *shShank3* MSNs in the presence of Trpv4 antagonist  
6 (HC-067047). (Repeated measures ANOVA, drug main effect  $F_{(2, 31)} = 5.883$ ,  $p =$   
7  $0.007$ , current steps main effect  $F_{(10, 310)} = 24.15$ ,  $p < 0.001$ , drug by current steps  
8 interaction  $F_{(20, 310)} = 1.685$ ,  $p = 0.035$   $n = 12$  cells, 4 mice (*shShank3*-Veh),  $n = 10$   
9 cells, 3 mice (*shShank3*-Trpv4),  $n = 12$  cells, 4 mice (*scrShank3*-Veh)). **(h)**  
10 Experimental design. C57BL6/j mice were injected neonatally in the NAc with *scr* or  
11 *shShank3* virus and at P50-60 were bilaterally cannulated above the NAc. After 7  
12 days, mice underwent the three-chamber social interaction assay. *ScrShank3* were  
13 infused with vehicle (aCSF/DMSO 0.3%). On the other hand, *shShank3* mice were  
14 infused with either vehicle (aCSF/DMSO 0.3%) or HC-067047 (2 $\mu$ g in aCSF/DMSO  
15 0.3%) 10 min before to start the test. **(h')** Representative image of the injection site  
16 and cannula placement above the NAc (scale bar: 250  $\mu$ m). **(i, j, k)** Left: time around  
17 the target during the social preference test for mice infected with *scrShank3* and  
18 infused with vehicle (**i**,  $t_{(5)} = 6.304$ ,  $p = 0.002$ ), mice infected with *shShank3* and  
19 infused with vehicle (**j**,  $t_{(7)} = 0.869$ ,  $p = 0.414$ ) or with HC-067047 (**k**,  $t_{(7)} = 4.324$ ,  $p$   
20  $= 0.004$ ). Right: juvenile preference index for mice infused either with vehicle or with  
21 HC-067047 (one-sample t-tests against chance level = 0.5: **(f)**;  $t_{(5)} = 6.459$ ,  $p = 0.001$ ,  
22 **(g)**;  $t_{(7)} = 1.02$ ,  $p = 0.342$ , **(h)**;  $t_{(7)} = 6.078$ ,  $p = 0.001$ ). **(l)** Juvenile preference index  
23 comparison between *shShank3*-vehicle and *shShank3*-HC-067047 ( $t_{(7)} = 2.6$ ,  $p =$   
24  $0.035$ ). Error bars report SEM.

25

#### 26 **Figure 4: LPS challenge in *Shank3*<sup>+/-</sup> unmasks social deficits**

27 **(a)** Experimental design. *Shank3*<sup>+/+</sup> and *Shank3*<sup>+/-</sup> were intraperitoneally injected with  
28 LPS or vehicle and 24 hrs later they were subjected to 3-chamber task. **(b, c, d, e)**  
29 Left: Time spent around the target (Paired-samples t-tests for object- vs. social: **(b)**;  
30  $t_{(7)} = 7.686$ ,  $p < 0.001$ , **(c)**;  $t_{(8)} = 4.199$ ,  $p = 0.003$ , **(d)**;  $t_{(8)} = 3.462$ ,  $p = 0.009$ , **(e)**;  
31  $t_{(9)} = 0.935$ ,  $p = 0.374$ ). Right: juvenile preference index (one-sample t-tests against  
32 chance level = 0.5: **(b)**;  $t_{(7)} = 7.2$ ,  $p < 0.001$ , **(c)**;  $t_{(8)} = 5.262$ ,  $p < 0.001$ , **(d)**;  $t_{(8)} =$

1 3.734,  $p = 0.006$ , (e);  $t_{(9)} = 0.9747$ ,  $p = 0.355$ ). (f) Experimental design. *Shank3<sup>+/-</sup>*  
2 and *Shank3<sup>+/-</sup>* were intraperitoneally injected with LPS and 7 days later were  
3 subjected to 3-chamber task. (g, h) Left: Time spent around the target (Paired-  
4 samples t-tests for object- vs. social: (g);  $t_{(6)} = 5.979$ ,  $p = 0.001$ , (h);  $t_{(9)} = 2.759$ ,  $p =$   
5  $0.022$ ). Right: juvenile preference index (one-sample t-tests against chance level =  
6 0.5: (g);  $t_{(6)} = 6.054$ ,  $p < 0.001$ , (h);  $t_{(9)} = 2.463$ ,  $p = 0.036$ ). (i) mRNA expression  
7 analysis of *IL-1 $\beta$* , *TNF- $\alpha$*  and *Trpv4* genes after LPS challenge in *Shank3<sup>+/-</sup>* (*IL-1 $\beta$*  one  
8 way ANOVA followed by Sidak's multiple comparisons test,  $F_{(2,9)}=10.33$ ,  $p=0.005$ ;  
9 *TNF- $\alpha$*  Kruskal-Wallis statistic 7.538,  $p=0.012$ ; *Trpv4* one way ANOVA followed by  
10 Sidak's multiple comparisons test,  $F_{(2,9)}=2.768$ ,  $p = 0.116$  ). (j) mRNA expression  
11 analysis of *IL-1 $\beta$* , *TNF- $\alpha$*  and *Trpv4* genes after LPS challenge in *Shank3<sup>+/-</sup>* (*IL-1 $\beta$*   
12 Kruskal-Wallis statistic 9.002,  $p=0.002$ ; *TNF- $\alpha$*  one way ANOVA followed by Sidak's  
13 multiple comparisons test,  $F_{(2,10)}=10.27$ ,  $p=0.004$ ; *Trpv4* one way ANOVA followed  
14 by Sidak's multiple comparisons test:  $F_{(2,9)} = 31.26$ ,  $p < 0.001$ ). (k) Experimental  
15 design. *Shank3<sup>+/-</sup>* were crossed with *Drd1a*-tdTomato mice labelling specifically D1R-  
16 MSNs in *Shank3<sup>+/-</sup>* background. *Ex-vivo* patch clamp recordings were made 24 hrs  
17 after the LPS injection. (l) Whole-cell recording of *Trpv4* current after LPS challenge  
18 in *Shank3<sup>+/-</sup>* and *Shank3<sup>+/-</sup>* mice (Repeated measures ANOVA, voltage steps main  
19 effect  $F_{(1.974,43.29)} = 16.15$ ,  $p=0.001$ , genotype by voltage steps interaction  $F_{(120, 880)}$   
20  $= 1.451$ ,  $p = 0.002$ ;  $n = 5$  cells, 2 mice (*Shank3<sup>+/-</sup>*),  $n=5$  cells, 2 mice (*Shank3<sup>+/-</sup>*+LPS),  
21  $n = 7$  cells, 2 mice (*Shank3<sup>+/-</sup>*)  $n = 9$  cells, 2 mice (*Shank3<sup>+/-</sup>*+LPS)) (m) Example  
22 traces from 300 pA depolarizing current injection in D1R+ MSNs of *Shank3<sup>+/-</sup>* mice  
23 after vehicle IP injection and treated with vehicle (left), D1R+ MSNs of *Shank3<sup>+/-</sup>* mice  
24 after LPS challenge and treated with vehicle (middle), and in D1R+ MSNs of  
25 *Shank3<sup>+/-</sup>* mice after LPS challenge and treated with HC-067047. (n) Number of  
26 action potentials (nAPs) across increasing depolarizing current steps (0-500 pA) for  
27 D1R-tom+:: *Shank3<sup>+/-</sup>* MSNs after LPS challenge (Repeated measures ANOVA, LPS  
28 challenge main effect  $F_{(2,30)} = 3.034$ ,  $p = 0.063$ , current steps main effect  $F_{(10, 300)} =$   
29  $28.08$ ,  $p < 0.001$ , LPS challenge by current steps interaction  $F_{(20, 300)} = 2.042$ ,  $p =$   
30  $0.006$ ,  $n = 10$  cells, 4 mice (D1R-tom+:: *Shank3<sup>+/-</sup>* + veh),  $n = 13$  cells, 3 mice (D1R-  
31 tom+:: *Shank3<sup>+/-</sup>* + LPS),  $n = 10$  cells, 3 mice (D1R-tom+:: *Shank3<sup>+/-</sup>* + LPS +  
32 HC067047)). Error bars report SEM.

1

2 **Figure 5: Trpv4 antagonist infused in the NAc improves social deficits in**  
3 ***Shank3*<sup>+/-</sup> mice challenged with LPS**

4 **(a)** Experimental design. Adult *Shank3*<sup>+/-</sup> mice were intraperitoneally injected with  
5 LPS and 24 hours later were subjected to the behavioural task. 30 minutes before  
6 the test, mice were infused (in the NAc) either with Trpv4 antagonist (HC-067047) or  
7 vehicle. **(b, c)** Left: Time spent around the target for *Shank3*<sup>+/-</sup> mice after LPS  
8 challenge and vehicle or HC-067047 infusion in the NAc (Paired-samples t-tests for  
9 object- vs. social: (b);  $t_{(6)} = 0.408$ ,  $p = 0.687$ , (c);  $t_{(6)} = 2.787$ ,  $p = 0.032$ ). Right:  
10 juvenile preference index (one-sample t-tests against chance level = 0.5: (b);  $t_{(6)} =$   
11  $0.629$ ,  $p = 0.4388$ , (c);  $t_{(6)} = 2.852$ ,  $p = 0.029$ ). Error bars report SEM.

12

13 **Supplementary Figure 1: *Shank3* downregulation during development**  
14 **increases the interaction with the non-social target**

15 **(a)** Schema of injection sites in the NAc with AAV-scrShank3-GFP or AAV-shShank3-  
16 luczsGreen in  $\leq$ P6 or P90 mice. Subsequently, the NAc was dissected and mRNA  
17 was extracted. **(b)** Real-time PCR analysis of NAc dissected from P6- or P90-injected  
18 mice confirm the downregulation of *Shank3* in sh infected mice (two-way ANOVA  
19 followed by Bonferroni's multiple comparisons test: Virus main effect  $F_{(1, 8)} = 18.80$ ,  
20  $p=0.003$ ). **(c, h)** Time spent in compartments for mice injected  $\leq$  P6 ((c) Paired-  
21 samples t-tests for object- vs. social-containing chambers: scrShank3;  $t_{(12)} = -5.047$ ,  
22  $p < 0.001$ ), shShank3;  $t_{(9)} = -0.645$ ,  $p = 0.535$ , (h) Paired-samples t-tests for object-  
23 vs. social-containing chambers: scrShank3;  $t_{(9)} = 3.144$ ,  $p = 0.012$ , shShank3;  $t_{(6)} =$   
24  $5.686$ ,  $p = 0.001$ ). **(d)** Total exploration time around the enclosures for mice injected  
25 neonatally (Mann-Whitney test,  $p = 0.784$ ). **(e)** Time spent around the enclosure  
26 containing the social stimulus ( $t_{(21)} = 2.152$ ,  $p = 0.043$ ). **(f)** Time spent around the  
27 non-social target ( $t_{(21)} = -3.499$ ,  $p = 0.002$ ). **(g)** Distance moved in the apparatus ( $t_{(21)} =$   
28  $-0.483$ ,  $p = 0.634$ ). **(i)** Total exploration time around the enclosures for mice  
29 injected during adulthood ( $t_{(15)} = 1.347$ ,  $p = 0.198$ ). **(j)** Time spent around the  
30 enclosure containing the social stimulus ( $t_{(15)} = -1.541$ ,  $p = 0.144$ ). **(k)** Time spent  
31 around the non-social target ( $t_{(15)} = 1.347$ ,  $p = 0.198$ ). **(l)** Distance moved in the  
32 apparatus ( $t_{(15)} = -1.544$ ,  $p = 0.143$ ). Error bars report SEM.

1

2 **Supplementary Figure 2: *Shank3* NAc downregulation alters D1R MSNs**  
3 **excitability**

4 **(a, d, i, o)** Total number of APs across all steps ((a) Mann Whitney test,  $p = 0.005$ .  
5 (d) unpaired t-test,  $t_{(18)} = 0.482$   $p = 0.636$ . (i) Mann Whitney test,  $p = 0.055$ . (o) Mann  
6 Whitney test,  $p = 0.134$ ). **(b, e, j, p)** Resting membrane potential of recorded cells  
7 ((b) Mann Whitney test,  $p = 0.721$ . (e) unpaired t-test,  $t_{(17)} = 0.105$   $p = 0.918$ . (j) Mann  
8 Whitney test,  $p < 0.001$ . (p) unpaired t-test,  $t_{(20)} = 0.385$   $p = 0.704$ ). **(c, f, k, q)** After-  
9 hyperpolarization current (AHP) of recorded cells ((c) unpaired t-test,  $t_{(14)} = 0.597$ ,  
10  $p = 0.559$ . (f) unpaired t-test,  $t_{(18)} = 0.291$   $p = 0.774$ . (k) unpaired t-test,  $t_{(24)} = 0.094$ ,  
11  $p = 0.926$ . (q) unpaired t-test,  $t_{(18)} = 0.099$   $p = 0.922$ ). **(g)** Number of action potentials  
12 (nAPs) across increasing depolarizing current steps (0-500 pA) for D1R-  
13 tom+::scrShank3 and shShank3 MSNs (Repeated measure (RM) two-way ANOVA,  
14 main effect of virus  $F_{(1, 27)} = 5.285$   $p = 0.030$ , main effect of current steps  $F_{(10, 270)} =$   
15  $32.46$   $p < 0.001$ , virus by current steps interaction  $F_{(10, 270)} = 1.957$   $p = 0.038$ ,  $n = 9$   
16 cells, 3 mice (shShank3),  $n = 20$  cells, 5 mice (scrShank3)). **(h)** Example traces from  
17 300 pA depolarizing current injection in D1R-tom+ MSNs infected with scrShank3  
18 (upper part) or with shShank3 (lower part). **(l, r)** Input resistance of recorded cells ((l)  
19  $t_{(27)} = 0.528$ ,  $p = 0.602$ . (r)  $t_{(19)} = 1.607$ ,  $p = 0.125$ ). **(m)** Number of action potential  
20 (nAPs) across increasing depolarizing current steps (0-500 pA) for D1R-tom-  
21 ::scrShank3 and shShank3 MSNs (Repeated measures ANOVA, main effect of virus  
22  $F_{(1, 20)} = 5.207$ ,  $p = 0.034$ , main effect of current steps  $F_{(10, 200)} = 11.77$ ,  $p < 0.001$ ,  
23 virus by current steps interaction  $F_{(10, 200)} = 2.958$   $p = 0.002$ ,  $n = 10$  cells, 3 mice  
24 (shShank3),  $n = 12$  cells, 3 mice (scrShank3)). **(n)** Example traces from 300 pA  
25 depolarizing current injection in D1R-tom- MSNs infected with scrShank3 (upper part)  
26 or with shShank3 (lower part). Error bars report SEM.

27

28 **Supplementary Figure 3: Dampening D1R-MSNs activity improves social**  
29 **deficits in NAc-shShank3 mice**

30 **(a)** Representative image of GIRK1 expression (green) in the NAc of Drd1a-dTomato  
31 (red) mice. **(b)** Experimental design. D1R-Cre positive (D1R:Cre<sup>+</sup>) mice were injected  
32 in the NAc with AAV-hSyn-DIO-hM4Di-mCherry (DREADD) and after P60 whole-cell

1 patch clamp recordings were performed. NAc slices were either pre-incubated with  
2 CNO and recorded in presence of CNO, or were incubated and recorded in aCSF  
3 only. **(c)** Number of action potentials (nAPs) across increasing depolarizing current  
4 steps (0-500 pA) in presence or absence of CNO. The number of APs was  
5 significantly decreased by the bath application of CNO (Repeated measures ANOVA,  
6 main effect of drug  $F_{(1, 11)} = 6.060$   $p = 0.032$ , main effect of current steps  $F_{(10, 110)} =$   
7  $12.11$   $p < 0.001$ , drug by current steps interaction  $F_{(10, 110)} = 4.342$   $p < 0.001$ ,  $n = 6$   
8 cells (aCSF) 7 cells (CNO);  $n = 2$  mice). **(d)** Distance moved for D1R:Cre<sup>±</sup> mice  
9 injected with DREADD and scrShank3 or DREADD and shShank3 (Two-way  
10 ANOVA: main effect of virus  $F_{(1, 28)} = 1.756$ ,  $p = 0.196$ , main effect of genotype  $F_{(1,$   
11  $28)} = 10.039$ ,  $p = 0.004$ , virus by genotype interaction  $F_{(1, 28)} = 4.959$ ,  $p = 0.034$ ). **(e)**  
12 Total exploration time for D1R:Cre<sup>+</sup> or D1R:Cre<sup>-</sup> mice injected with DREADD and  
13 scrShank3 or DREADD and shShank3 (Two-way ANOVA: main effect of virus  $F_{(1,$   
14  $28)} = 0.902$ ,  $p = 0.350$ , main effect of genotype  $F_{(1, 28)} = 2.135$ ,  $p = 0.155$ , virus by  
15 genotype interaction  $F_{(1, 28)} = 2.604$ ,  $p = 0.118$ ). **(f)** Time spent in compartments of  
16 the three-chamber social interaction task for D1R:Cre<sup>+</sup> or D1R:Cre<sup>-</sup> mice injected with  
17 DREADD and scrShank3 or DREADD and shShank3 (D1R:Cre<sup>+</sup>::scrShank3:  $t_{(7)} =$   
18  $4.916$ ,  $p = 0.002$ , D1R:Cre<sup>+</sup>::scrShank3:  $t_{(7)} = 0.043$ ,  $p = 0.967$ , D1R:Cre<sup>-</sup>::shShank3:  
19  $t_{(6)} = -0.355$ ,  $p = 0.735$ , D1R:Cre<sup>-</sup>::shShank3:  $t_{(8)} = 3.031$ ,  $p = 0.016$ ). Error bars  
20 report SEM.

21

#### 22 **Supplementary Figure 4: D1R-MSNs shShank3 downregulated genes** 23 **association with SFARI genes**

24 **(a)** Differential expression analysis of AAV-scrShank3 vs AAV-ShShank3 shows  
25 small indirect transcriptional effect in non-infected samples, while infected samples  
26 display the stronger transcriptomic alterations. In both D1R+ **(b)** and D1R- **(c)** SFARI  
27 associated genes are altered, supporting the link between Shank3 downregulation  
28 with an autism-related phenotype.

29

#### 30 **Supplementary Figure 5: Supplementary data on behavioral experiments** 31 **showed in Figure 4**

32 **(a-b)** Real-time PCR analysis of NAc dissected from P6- or P90-injected mice confirm

1 the upregulation of *Trpv4* in P6 sh-infected mice (P6, unpaired t-test  $t_{(4)} = 2.980$ ,  $p =$   
2  $0.041$ , P90  $t_{(5)} = 0.4203$ ,  $p = 0.69$ ). **(c)** Time spent in compartments for mice infected  
3 with scrShank3 or shShank3 and infused with vehicle or HC-067047 (Paired-samples  
4 t-tests for object- vs. social-containing chambers scrShank3 + veh:  $t_{(10)} = 2.772$ ,  $p =$   
5  $0.020$ , shShank3 + veh:  $t_{(7)} = 0.462$ ,  $p = 0.658$ , shShank3 + HC-067047:  $t_{(7)} = 3.339$ ,  
6  $p = 0.012$ ). **(d)** Distance moved during social preference test (one way ANOVA  
7 followed by Bonferroni's multiple comparisons test:  $F_{(3,24)}=0.586$ ,  $p = 0.630$ ). Error  
8 bars report SEM.

9

### 10 **Supplementary Figure 6: *Shank3*<sup>+/-</sup> does not show social deficits**

11 **(a)** Behavioural task paradigm. **(b, c)** Left: Time spent around the target during social  
12 preference test for *Shank3*<sup>+/+</sup> and *Shank3*<sup>+/-</sup> mice (paired-samples t-tests for object-  
13 vs. social: *Shank3*<sup>+/+</sup>:  $t_{(9)} = 5.167$ ,  $p < 0.001$ ; *Shank3*<sup>+/-</sup>:  $t_{(12)} = 3.026$ ,  $p = 0.011$ ). Right:  
14 juvenile preference index (one-sample t-tests against chance level = 0.5: *Shank3*<sup>+/+</sup>:  $t$   
15  $_{(9)} = 5.617$ ,  $p < 0.001$ ; *Shank3*<sup>+/-</sup>:  $t_{(12)} = 3.146$ ,  $p = 0.008$ ). **(d)** Time spent in the juvenile,  
16 object or in center chamber during social preference test for *Shank3*<sup>+/+</sup>, *Shank3*<sup>+/-</sup> and  
17 *Shank3*<sup>-/-</sup> mice (Paired-samples t-tests for object- vs. social-containing chambers:  
18 *Shank3*<sup>+/+</sup>:  $t_{(9)} = 3.269$ ,  $p = 0.009$ ; *Shank3*<sup>+/-</sup>:  $t_{(12)} = 2.705$ ,  $p = 0.019$ ). **(e)** Distance  
19 moved during social preference test (Unpaired-samples t-tests:  $t_{(21)} = 0.9307$ ,  $p =$   
20  $0.363$ ).

21

### 22 **Supplementary Figure 7: Supplementary data on behavioral experiments** 23 **showed in Figure 5**

24 LPS challenge induces social deficits in *Shank3*<sup>+/-</sup> mice after 24 hours: **(a)** Time spent  
25 in the juvenile, object or in the center chamber during social preference test for  
26 *Shank3*<sup>+/+</sup> and *Shank3*<sup>+/-</sup> previously injected with vehicle or LPS (Paired-samples t-  
27 tests for object- vs. social-containing chambers: *Shank3*<sup>+/+</sup> + veh:  $t_{(7)} = 4.838$ ,  $p =$   
28  $0.002$ , *Shank3*<sup>+/+</sup> + LPS:  $t_{(8)} = 3.87$ ,  $p = 0.005$ , *Shank3*<sup>+/-</sup> + veh:  $t_{(8)} = 4.526$ ,  $p = 0.002$ ,  
29 *Shank3*<sup>+/-</sup> + LPS:  $t_{(9)} = 0.3939$ ,  $p = 0.703$ ). **(b)** Distance moved during social  
30 preference test (two-way ANOVA followed by Bonferroni's multiple comparisons test:  
31 LPS treatment main effect  $F_{(1,32)}=58.03$ ,  $p < 0.001$ ). 7 days after LPS challenge the  
32 sociability and the distance moved are not impaired anymore: **(c)** Time spent in the

1 juvenile, object or in the center chamber during social preference test for *Shank3<sup>+/+</sup>*  
2 and *Shank3<sup>+/-</sup>* previously injected LPS (Paired-samples t-tests for object- vs. social-  
3 containing chambers: *Shank3<sup>+/+</sup>* + LPS:  $t_{(7)} = 5.083$ ,  $p = 0.002$ , *Shank3<sup>+/-</sup>* + LPS:  $t_{(10)}$   
4  $= 2.536$ ,  $p = 0.032$ . **(d)** Distance moved during social preference test (unpaired t-test  
5  $t_{(15)} = 0.3116$ ,  $p = 0.76$ ). Error bars report SEM.

6

7 **Supplementary Figure 8: Supplementary data on behavioral experiments**  
8 **showed in Figure 6**

9 **(a)** Time spent in compartments for *Shank3<sup>+/-</sup>* mice after LPS challenge and with  
10 vehicle or HC-067047 infusion in the NAc (Paired-samples t-tests for object- vs.  
11 social-containing chambers: *Shank3<sup>+/-</sup>* + veh:  $t_{(6)} = 1.3229$ ,  $p = 0.232$ , *Shank3<sup>+/-</sup>* +  
12 HC-067047:  $t_{(6)} = 1.17$ ,  $p = 0.286$ ). **(b)** Distance moved during social preference test  
13 (unpaired t-test:  $t_{(12)} = 0.3708$ ,  $p = 0.717$ ). Error bars report SEM.



## 1   **METHOD DETAILS**

2

### 3   **Viruses and stereotactic injections**

4           Viruses used in this study: (1) purified scr*Shank3* and sh*Shank3* (AAV1-GFP-  
5 U6-scrmbshRNA; titer:  $5.9 \times 10^{13}$  GC/mL and AAV5-ZacF-U6-luczsGreen-sh*Shank3*;  
6 titer:  $7.4 \times 10^{13}$  GC/mL, VectorBioLab); (2) AAV5/hsyn-DIO-hM4D(Gi)-mCherry  
7 (AV44961, titer:  $5.5 \times 10^{12}$  virus molecules/mL, UNC GTC vector core). Viral injections  
8 in the NAc were delivered in mice either at an early time-point (at P5 or P6;  $\leq P6$ ) or  
9 later in life ( $>P30$ ) (, depending on the experimental cohort. After anesthesia induction  
10 with a mixture of isoflurane/O<sub>2</sub>, C57Bl/6j wildtype pups or  $>P30$  mice were placed on  
11 a stereotaxic frame (Angle One; Leica, Germany). For the pups, the coordinates used  
12 were AP: +3.5 mm, ML:  $\pm 0.8$  mm, DV: -3.2 mm (measured from lambda), and for  
13  $>P30$  mice, the coordinates were AP: +1.2 mm, ML:  $\pm 1.0$  mm, DV: -4.4/-4.0 mm  
14 (measured from bregma). To obtain bilateral NAc infection, 100 nl of viral solution  
15 was infused per injection in pups and 150 nl of viral solution was infused per injection  
16 in  $>P30$  mice.

17

### 18   **Social preference test**

19           A three-chambered social interaction assay was used, comprising a rectangular  
20 Plexiglas arena (60 × 40 × 22 cm) (Ugo Basile, Varese, Italy) divided into three  
21 chambers (each 20 × 40 × 22 (h) cm). The walls of the center chamber had doors that  
22 could be lifted to allow free access to all chambers. The social preference test was  
23 performed similarly as published by Moy *et al*<sup>83</sup>. Briefly, each mouse was placed in  
24 the arena for a habituation period of 10 min, when it was allowed to freely explore the  
25 empty arena. At the end of the habituation, the test was performed: two enclosures  
26 with metal vertical bars were placed in the center of the two outer chambers. One  
27 enclosure was empty (serving as an inanimate object) whereas the other contained a  
28 social stimulus (unfamiliar juvenile mouse  $25 \pm 1$  day old). The enclosures allowed  
29 visual, auditory, olfactory, and tactile contact between the experimental mice and the  
30 mice acting as social stimuli. The juvenile mice in the enclosures were habituated to  
31 the apparatus and the enclosures for a brief period of time on the 3 days preceding  
32 the experiment. The experimental mouse was allowed to freely explore the apparatus

1 and the enclosures for 10 min. The position of the empty vs. juvenile-containing  
2 enclosures alternated and was counterbalanced for each trial to avoid any bias effects.  
3 Animals that their total exploration time for both the enclosures was less than 10  
4 seconds were excluded from the analysis. In particular, one mouse in the  
5 D1:Cre<sup>+</sup>::scr*Shank3* group was excluded from the analysis according to this criterion.  
6 Every session was video-tracked and recorded using Ethovision XT (Noldus,  
7 Wageningen, the Netherlands), which provided an automated recording of the time  
8 around the enclosures (with virtual zones designed around them), the distance moved  
9 and the velocity. The time spent around each enclosure was assessed and then used  
10 to determine the preference score for the social target as compared to the empty  
11 enclosure (social/(social + empty)). The arena was cleaned with 1% acetic acid  
12 solution and dried between trials.

13 In the rescue experiment with the chemogenetic approach, 30 minutes before the  
14 habituation, scr- and sh*Shank3* injected mice were intraperitoneally injected with  
15 Clozapine N-oxide (CNO, Cat. No.: BML-NS105-0025, Lot No.: 07131709) dissolved  
16 in saline (5 mg/Kg).

17 In the LPS challenge experiments, *Shank3*<sup>+/+</sup> and *Shank3*<sup>+/-</sup> mice were  
18 intraperitoneally injected 24 hours before the test with LPS at a dose of 2mg/Kg in  
19 saline (NaCl 0.9%) (Lipopolysaccharides from *Escherichia coli* O26:B6, Sigma-  
20 Aldrich)

21

## 22 **Whole-cell patch clamp recordings**

23 Coronal midbrain slices 250 μm thick containing the NAc were prepared  
24 following the experimental injection protocols described above. Brain were sliced in  
25 artificial cerebrospinal fluid (aCSF) containing 119 mM NaCl, 2.5 mM KCl, 1.3 mM  
26 MgCl<sub>2</sub>, 2.5 mM CaCl<sub>2</sub>, 1.0 mM NaH<sub>2</sub>PO<sub>4</sub>, 26.2 mM NaHCO<sub>3</sub> and 11 mM glucose,  
27 bubbled with 95% O<sub>2</sub> and 5% CO<sub>2</sub>. Slices were kept for 20-30 min at 35°C and then  
28 transferred at room temperature. Whole-cell voltage clamp or current clamp  
29 electrophysiological recordings were conducted at 32°–34° in aCSF (2–3 ml/min,  
30 submerged slices). Recording pipette contained the following internal solution:  
31 140 mM K-Gluconate, 2 mM MgCl<sub>2</sub>, 5 mM KCl, 0.2 mM EGTA, 10 mM HEPES, 4 mM  
32 Na<sub>2</sub>ATP, 0.3 mM Na<sub>3</sub>GTP and 10 mM creatine-phosphate. The cells were recorded

1 at the access resistance from 10–30 M $\Omega$ . Resting membrane potential (in mV) was  
2 read using the Multiclamp 700B Commander (Molecular Devices) while injecting no  
3 current ( $I = 0$ ) immediately after breaking into a cell. Action potentials (AP) were  
4 elicited in current clamp configuration by injecting depolarizing current steps (50 pA,  
5 500 ms) from 0 to 500 pA, in presence of Picrotoxin (100 $\mu$ M) and Kynurenic acid  
6 (3mM). For CNO validation and HC-067047 rescue, slices were incubated 20 min  
7 with the drugs (CNO 20 $\mu$ M, HC-067047 10  $\mu$ M, in DMSO 0.03% final concentration)  
8 before to start the excitability protocol. After-hyperpolarization current (AHP) was  
9 assessed in voltage clamp configuration by holding the cell at -60mV with a step of  
10 +60mV for 100 ms. TRPV4 currents were assessed by holding the cell at 0mV  
11 followed by a 400 ms ramp from -100 mV to +100 mV. The ramp protocol was applied  
12 every 5 seconds for 5 minutes (baseline) and then, the TRPV4 inhibitor, HC067047  
13 (10 $\mu$ M), was applied and cells were recorded for 20 min. Trpv4 current response was  
14 obtained by subtracting the current in the presence of HC067047 from the baseline.  
15 The synaptic responses were collected with a Multiclamp 700B-amplifier (Axon  
16 Instruments, Foster City, CA), filtered at 2.2kHz, digitized at 5 Hz, and analyzed  
17 online using Igor Pro software (Wavemetrics, Lake Oswego, OR).

18

### 19 **RNA extraction, cDNA synthesis, and RT-PCR**

20 Total RNA was extracted using RNeasy Mini Kit (cat 74104) from QIAGEN.  
21 The extraction was performed following the details of the kit. After the extraction, RNA  
22 quantification was performed using NanoDrop 1000 (Thermo Scientific) and the  
23 samples were stored at -80°C until cDNA synthesis. RNA integrity was checked  
24 using the Agilent 2100 Bioanalyzer (RIN was always >8). cDNA synthesis for two-  
25 step RT-PCR was performed using the QuantiTect Reverse Transcription Kit (cat  
26 205313) from QIAGEN. For each sample, 1 ug of RNA was retrotranscribed in cDNA  
27 following the kit instruction. 200 ng of cDNA was used for the RT-PCR analysis using  
28 a Sybr Green technology. Plates were processed on the 7900HT systems from  
29 Thermo Fisher Scientific, equipped with automated devices for plates loading. (Tecan  
30 Freedom EVO). SHANK3 forward primer 5' acgaagtgcctgcgtctggac 3', reverse  
31 primer 5' ctcttgccaaccattctcatcagtg 3'; IL-1 $\beta$  forward primer 5'  
32 caaccaacaagtgatatttccatg 3', reverse primer 5' gatccacactctccagctgca 3'; TNF- $\alpha$

1 forward primer 5' gacgtggaactggcagaagag 3', reverse primer 5'  
2 gccacaagcaggaatgagaag 3'; TRPV4 forward primer 5' gtctcgcaagtcaaggact 3',  
3 reverse primer 5' aaacttacgccactgtctc 3'; Actin forward primer 5'  
4 agagggaaatcgtgctgac 3', reverse primer 5' caatagtgatgacctggccgt 3'. Reactions  
5 were carried out using iTaq™ Universal SYBR® Green Supermix (Biorad) by 50°C  
6 for 2 min, 95°C for 10 min followed by 40 cycles at 95°C for 15 s and 60°C for 1 min.  
7 Relative quantification of gene expression was performed according to the  $\Delta\Delta$ -Ct  
8 method <sup>84</sup>.

9

## 10 **FACS sorting and RNA sequencing**

11 Mice were anesthetized in isoflurane and decapitated to dissect fresh brains  
12 in ice-cold aCSF (see above). Brains were kept in ice-cold and O<sub>2</sub> 95%, CO<sub>2</sub> 5%  
13 bubbled aCSF during the preparation of coronal slices, 300um thick using a  
14 vibratome. Selected slices were used to manually microdissect the NAc using a total  
15 of 4-5 P30 mice for each experiment. The dissected tissue was moved in 1.5ml FACS  
16 buffer (L15 added with Glucose 2mg/ml, Bovine Serum Albumin 0,1%, Citrate  
17 Phosphate Dextrose 16.7%, DNaseI 10U/ml). After removing the FACS buffer, the  
18 tissue was incubated in 400 ul of L15 0.01%Papain (Worthington, #LS003118) and  
19 incubated 30' at +37°C. The tissue was mechanically disrupted pipetting 10 times  
20 with a P1000 and a P200 sterile tip, and Papain digestion was blocked adding FACS  
21 buffer 0.02% Chicken egg white inhibitor (Sigma, #T9253). The cell suspension was  
22 passed through a 70  $\mu$ m strainer (ClearLine, # 141379C) and spun at 200g for 5' at  
23 +4°C. The precipitate was resuspended in 1ml FACS buffer, this step was repeated  
24 a second time to further wash cellular debris. 8 ul of Hoechst (0.1 mg/mL) were added  
25 to the sample and incubated for 7' at +37°C. Before FACsorting we added the 5 ul of  
26 the cellular death dye Draq7™ (Viability dye, Far-red DNA intercalating agent,  
27 Beckman Coulter, #B25595). The suspension was sorted on an Astrios II cell sorter  
28 (Beckman Coulter), enriching for Hoechst stained and Draq7™ non-stained particles.  
29 Forward and side scatter were used to exclude smaller cellular debris and duplets.  
30 488nm and 568nm laser excitation were used to separate the desired combinations  
31 of cellular population. Each cell population was sorted in FACS buffer and spun down  
32 at 200g for 5' to be dried and snap-frozen in liquid nitrogen before RNA extraction.

1 FACsorting experiments were performed within the Flow cytometry facility at the  
2 University of Geneva.

3

#### 4 **Sequencing libraries preparation**

5 To prepare cDNA libraries collected frozen tissue was processed using a  
6 QIAGEN RNeasy kit (QIAGEN, #74034) to extract RNA and prepare cDNA libraries  
7 using SMARTseq v4 kit (Clontech, # 634888) and sequenced using HiSeq 2500 in  
8 100 pairbase length fragments for a minimum of 1 million reads per sample.  
9 Sequences were aligned using STAR aligner<sup>85</sup> using the mouse genome reference  
10 (GRCm38). The number of read per transcripts was calculated with the open-source  
11 HTseq Python library<sup>86</sup>. All analyses were computed on the Vital-it cluster  
12 administered by the Swiss Institute of Bioinformatics. Sequencing experiments were  
13 performed within the Genomics Core Facility of the University of Geneva.

14

#### 15 **Sequencing analysis**

16 Count tables were normalized to reads per million (RPM) and genes were  
17 filtered keeping only those with more than 10 RPM (supplementary information Table  
18 S1). DEseq2 package was used to normalize samples to RPM count tables. In **Fig.**  
19 **3b** we selected differentially expressed genes were selected on a worst-case  
20 scenario threshold of 1.5 fold, keeping the data from the replicates corresponding to  
21 the pair that gave the minimum fold change between each pair of conditions tested.  
22 The full list of results for the worst-case scenario fold change analysis is shown in  
23 **Supplementary figure 4a**. We performed PCA analysis in with all of the samples  
24 and all of the genes selected above worst-case scenario threshold of 1.5 (855 genes,  
25 supplementary information Table S2), these data were normalized by rlog  
26 transformation from the DEseq2 package and then used for PCA analysis. SFARI  
27 genes (<https://gene.sfari.org/tools>) belonging to the list of significantly altered genes  
28 in AAV-scr*Shank3* versus AAV-sh*Shank3* infected D1R-tom+ and D1R-tom-  
29 samples are plotted in **Supplementary figure 4b-c** and have been tested for  
30 enrichment using Fisher test in **Fig. 3d**, the 178 worst case scenario differentially  
31 expressed genes in AAV-sh*Shank3* versus AAV-scr*Shank3* D1R-tom+ samples, split  
32 in sh upregulated and sh downregulated were analyzed for significantly enriched

1 GO:Terms using GOrrilla<sup>87</sup> and the REViGO<sup>88</sup> online tools, selecting GO:Terms with  
2 adjusted P-value lower than 1e-3. Gene expression heatmap in **Fig. 3e** was produced  
3 normalizing the rlog transformation of RPM count tables and allowing samples and  
4 genes to cluster by Euclidean distance (supplementary information Table S3). All  
5 analysis have been made using R, packages used: DEseq2<sup>89</sup>, reshape2<sup>90</sup>, ggplot2<sup>91</sup>,  
6 scater<sup>92</sup>, IHW<sup>93</sup>. Count table and FASTQ files are available at the GEO database  
7 (GSE139683).

8

### 9 **Cannulations and intra-NAc microinfusions**

10 As explained in the subchapter “Viruses and stereotactic injections”, adult  
11 mice (P50-60) were placed on a stereotaxic frame (Angle One; Leica, Germany).  
12 Bilateral craniotomy (1 mm in diameter) was then performed bilaterally with the  
13 following stereotactic coordinates: AP: +1.2 mm, ML: ± 1 mm, DV: -3.8 mm  
14 (measured from bregma). Bilateral stainless steel 26-gauge cannula (5 mm ped,  
15 PlasticsOne, Virginia, USA) was implanted above the NAcs and fixed on the skull  
16 with dental acrylic. Between experiments, the cannula was protected by a removable  
17 cap in aluminum. All animals underwent behavioural experiments 1–2 weeks after  
18 surgery. In the rescue experiment with the Trpv4 antagonist, cannulated scr- or  
19 sh*Shank3* and *Shank3*<sup>+/-</sup> mice were infused 10 minutes before the three-chamber  
20 task (**Fig. 3h**, more precisely, 10 minutes before the habituation in the arena).  
21 Cannulated scr- and sh*Shank3* mice performed the behavioural task two times with  
22 7-days pause period between the trails. sh*Shank3* injected mice were randomly  
23 infused with 2µL (500nL m<sup>-1</sup>) of vehicle (~3 % dimethyl sulfoxide (DMSO, Sigma)  
24 diluted in aCSF) or with 2µL Trpv4 antagonist (HC-067047, Sigma 2 µg diluted in  
25 aCSF-DMSO ~3 %). The treatment was counterbalanced between trials. On the  
26 other hand, scr*Shank3* injected mice were infused both trials with vehicle. Similarly,  
27 cannulated *Shank3*<sup>+/-</sup> mice were intraperitoneally injected with LPS at a dose of  
28 2mg/Kg 24 hours before the test. Then mice were randomly infused 10 minutes  
29 before the test with 2µL (500nL m<sup>-1</sup>) of vehicle (~3 % dimethyl sulfoxide (DMSO,  
30 Sigma) diluted in aCSF) or with 2µL Trpv4 antagonist (HC-067047, Sigma 2 µg  
31 diluted in aCSF-DMSO ~3 %).

32

## 1 **Tissue processing for post-hoc studies**

2 For *post hoc* analysis, adult mice were anesthetized with pentobarbital (Streuli  
3 Pharma) and sacrificed by intracardial perfusion of 0.9% saline followed by 4% PFA  
4 (Biochemica). Brains were post-fixed overnight in 4% PFA at 4 °C. 24 hours later,  
5 they were washed with PBS before 50µm thick vibratome cutting. After each  
6 behavioural experiment, *post hoc* analysis was performed to validate the localization  
7 of the infection and/or cannulation.

8

## 9 **Immunohistochemistry and image acquisition**

10 Prepared slices were washed three times with phosphate buffered saline  
11 (PBS) 0.1M. Slices were then pre-incubated with PBS-BSA-TX buffer (0.5% BSA and  
12 0.3% Triton X-100) for 90 minutes at room temperature in the dark. Subsequently,  
13 cells were incubated with primary antibodies diluted in PBS-BSA-TX (0.5% BSA and  
14 0.3% Triton X-100) overnight at 4°C in the dark. The following day slices were  
15 washed three times with PBS 0.1M and incubated for 90 minutes at room  
16 temperature in the dark with the secondary antibodies diluted in PBS-BSA buffer  
17 (0.5% BSA). Finally, coverslips were mounted using fluoroshield mounting medium  
18 with DAPI (Abcam, ab104139). Primary antibody used in this study: polyclonal rabbit  
19 anti-Kir3.1 (Girk1, 1/750 dilution, Alamone labs, APC-005). Secondary antibody used  
20 at 1/500 dilution: donkey anti-rabbit 488 (Alexa Fluor, Abcam ab150073).

21 *Post hoc* tissue images were acquired using a confocal laser-scanning microscope  
22 LSM700 (Zeiss) or an AxioCam fluo wide field microscope (Zeiss) depending on the  
23 size of the ROI.

24

## 25 **Statistical analysis**

26 Statistical analysis was conducted with GraphPad Prism 7 and 8 (San Diego,  
27 CA, USA) and SPSS version 21.0 (IBM Corp, 2012). Statistical outliers were  
28 identified with the ROUT method (Q = 1) and excluded from the analysis. The  
29 normality of sample distributions was assessed with the Shapiro–Wilk criterion and  
30 when violated non-parametric tests were used. When normally distributed, the data  
31 were analyzed with independent t-tests, one sample t-tests, one-way ANOVA and  
32 repeated measures (RM) ANOVA as appropriate. When normality was violated, the

1 data were analyzed with Mann–Whitney test, while for multiple comparisons,  
2 Kruskal–Wallis or Friedman test was followed by Dunn’s test. For the analysis of  
3 variance with two factors (two-way ANOVA, RM two-way ANOVA, and RM two-way  
4 ANOVA by both factors), normality of sample distribution was assumed, and followed  
5 by Sidak or Tukey post hoc test. Data are represented as the mean  $\pm$  SEM and the  
6 significance was set at 95% of confidence.



1 **Reference list**

- 2
- 3 1. Bonaglia, M. C. *et al.* Disruption of the ProSAP2 gene in a  
4 t(12;22)(q24.1;q13.3) is associated with the 22q13.3 deletion syndrome. *Am. J.*  
5 *Hum. Genet.* **69**, 261–268 (2001).
- 6 2. Guilmatre, A., Huguet, G., Delorme, R. & Bourgeron, T. The emerging role of  
7 SHANK genes in neuropsychiatric disorders. *Dev. Neurobiol.* **74**, 113–122  
8 (2014).
- 9 3. Bey, A. L. *et al.* Brain region-specific disruption of Shank3 in mice reveals a  
10 dissociation for cortical and striatal circuits in autism-related behaviors. *Transl.*  
11 *Psychiatry* **8**, 94 (2018).
- 12 4. Fuccillo, M. V., Rothwell, P. E. & Malenka, R. C. From synapses to behavior:  
13 What rodent models can tell us about neuropsychiatric disease. *Biological*  
14 *Psychiatry* vol. 79 4–6 (2016).
- 15 5. Fuccillo, M. V. Striatal circuits as a common node for autism pathophysiology.  
16 *Frontiers in Neuroscience* vol. 10 (2016).
- 17 6. Wang, W. *et al.* Striatopallidal dysfunction underlies repetitive behavior in  
18 Shank3-deficient model of autism. *J. Clin. Invest.* **127**, 1978–1990 (2017).
- 19 7. Jaramillo, T. C. *et al.* Altered Striatal Synaptic Function and Abnormal  
20 Behaviour in Shank3 Exon4-9 Deletion Mouse Model of Autism. *Autism Res.*  
21 **9**, 350–375 (2016).
- 22 8. Bariselli, S. *et al.* Role of VTA dopamine neurons and neuroligin 3 in sociability  
23 traits related to nonfamiliar conspecific interaction. *Nat. Commun.* **9**, 3173  
24 (2018).
- 25 9. Dölen, G., Darvishzadeh, A., Huang, K. W. & Malenka, R. C. Social reward  
26 requires coordinated activity of nucleus accumbens oxytocin and serotonin.  
27 *Nature* **501**, 179–184 (2013).
- 28 10. Walsh, J. J. *et al.* 5-HT release in nucleus accumbens rescues social deficits in  
29 mouse autism model. *Nature* **560**, 589–594 (2018).
- 30 11. Supekar, K. *et al.* Deficits in mesolimbic reward pathway underlie social  
31 interaction impairments in children with autism. *Brain* **141**, 2795–2805 (2018).
- 32 12. Sperdin, H. F. *et al.* Early alterations of social brain networks in young children  
33 with autism. *Elife* **7**, (2018).

- 1 13. Bariselli, S. *et al.* SHANK3 controls maturation of social reward circuits in the  
2 VTA. *Nat. Neurosci.* **19**, 926–934 (2016).
- 3 14. Yi, F. *et al.* Autism-associated SHANK3 haploinsufficiency causes Ih  
4 channelopathy in human neurons. *Science (80-. )*. **352**, aaf2669 (2016).
- 5 15. Monteiro, P. & Feng, G. SHANK proteins: Roles at the synapse and in autism  
6 spectrum disorder. *Nature Reviews Neuroscience* vol. 18 147–157 (2017).
- 7 16. Jaramillo, T. C. *et al.* Novel Shank3 mutant exhibits behaviors with face validity  
8 for autism and altered striatal and hippocampal function. *Autism Res.* **10**, 42–  
9 65 (2017).
- 10 17. Mei, Y. *et al.* Adult restoration of Shank3 expression rescues selective autistic-  
11 like phenotypes. *Nature* **530**, 481–484 (2016).
- 12 18. Peça, J. *et al.* Shank3 mutant mice display autistic-like behaviours and striatal  
13 dysfunction. *Nature* **472**, 437–442 (2011).
- 14 19. Wang, X. *et al.* Altered mGluR5-Homer scaffolds and corticostriatal  
15 connectivity in a Shank3 complete knockout model of autism. *Nat. Commun.* **7**,  
16 11459 (2016).
- 17 20. Hughes, H. K., Mills Ko, E., Rose, D. & Ashwood, P. Immune Dysfunction and  
18 Autoimmunity as Pathological Mechanisms in Autism Spectrum Disorders.  
19 *Frontiers in Cellular Neuroscience* vol. 12 405 (2018).
- 20 21. Garbett, K. *et al.* Immune transcriptome alterations in the temporal cortex of  
21 subjects with autism. *Neurobiol. Dis.* **30**, 303–311 (2008).
- 22 22. Saurer, T. B., Ijames, S. G. & Lysle, D. T. Evidence for the nucleus accumbens  
23 as a neural substrate of heroin-induced immune alterations. *J. Pharmacol.*  
24 *Exp. Ther.* **329**, 1040–1047 (2009).
- 25 23. Ben-Shaan, T. L. *et al.* Activation of the reward system boosts innate and  
26 adaptive immunity. *Nat. Med.* **22**, 940–944 (2016).
- 27 24. Kolevzon, A., Delaby, E., Berry-Kravis, E., Buxbaum, J. D. & Betancur, C.  
28 Neuropsychiatric decompensation in adolescents and adults with Phelan-  
29 McDermid syndrome: A systematic review of the literature. *Molecular Autism*  
30 vol. 10 (2019).
- 31 25. Gunaydin, L. A. *et al.* Natural neural projection dynamics underlying social  
32 behavior. *Cell* **157**, 1535–1551 (2014).

- 1 26. Bariselli, S., Contestabile, A., Tzanoulinou, S., Musardo, S. & Bellone, C.  
2 SHANK3 Downregulation in the Ventral Tegmental Area Accelerates the  
3 Extinction of Contextual Associations Induced by Juvenile Non-familiar  
4 Conspecific Interaction. *Front. Mol. Neurosci.* **11**, 360 (2018).
- 5 27. Ade, K. K., Wan, Y., Chen, M., Gloss, B. & Calakos, N. An improved BAC  
6 transgenic fluorescent reporter line for sensitive and specific identification of  
7 striatonigral medium spiny neurons. *Front. Syst. Neurosci.* **5**, (2011).
- 8 28. Yi, F. *et al.* Autism-associated SHANK3 haploinsufficiency causes Ih  
9 channelopathy in human neurons. *Science (80-. )*. **352**, aaf2669 (2016).
- 10 29. Kanju, P. & Liedtke, W. Pleiotropic function of TRPV4 ion channels in the  
11 central nervous system. *Exp. Physiol.* **101**, 1472–1476 (2016).
- 12 30. Vriens, J. *et al.* Cell swelling, heat, and chemical agonists use distinct  
13 pathways for the activation of the cation channel TRPV4. *Proc. Natl. Acad. Sci.*  
14 *U. S. A.* **101**, 396–401 (2004).
- 15 31. Balakrishna, S. *et al.* TRPV4 inhibition counteracts edema and inflammation  
16 and improves pulmonary function and oxygen saturation in chemically induced  
17 acute lung injury. **307**, L158–L172 (2014).
- 18 32. Shibasaki, K. *et al.* TRPV4 activation at the physiological temperature is a  
19 critical determinant of neuronal excitability and behavior. *Pflugers Arch. Eur. J.*  
20 *Physiol.* **467**, 2495–2507 (2015).
- 21 33. Copping, N. A. *et al.* Touchscreen learning deficits and normal social approach  
22 behavior in the Shank3B model of Phelan–McDermid Syndrome and autism.  
23 *Neuroscience* **345**, 155–165 (2017).
- 24 34. Yang, M. *et al.* Reduced excitatory neurotransmission and mild Autism-  
25 Relevant phenotypes in adolescent shank3 null mutant mice. *J. Neurosci.* **32**,  
26 6525–6541 (2012).
- 27 35. Liljeholm, M. & O’Doherty, J. P. contributions of the striatum to learning,  
28 motivation, and performance: An associative account. *Trends in Cognitive*  
29 *Sciences* vol. 16 467–475 (2012).
- 30 36. Aharon, I. *et al.* Beautiful faces have variable reward value: fMRI and  
31 behavioral evidence. *Neuron* **32**, 537–551 (2001).
- 32 37. Bhanji, J. P. & Delgado, M. R. The social brain and reward: Social information

- 1 processing in the human striatum. *Wiley Interdisciplinary Reviews: Cognitive*  
2 *Science* vol. 5 61–73 (2014).
- 3 38. Cunningham, W. A., Johnson, M. K., Gatenby, J. C., Gore, J. C. & Banaji, M.  
4 R. Neural Components of Social Evaluation. *J. Pers. Soc. Psychol.* **85**, 639–  
5 649 (2003).
- 6 39. Spreckelmeyer, K. N. *et al.* Anticipation of monetary and social reward  
7 differently activates mesolimbic brain structures in men and women. *Soc.*  
8 *Cogn. Affect. Neurosci.* **4**, 158–165 (2009).
- 9 40. Scott-Van Zeeland, A. A., Dapretto, M., Ghahremani, D. G., Poldrack, R. A. &  
10 Bookheimer, S. Y. Reward processing in autism. *Autism Res.* **3**, 53–67 (2010).
- 11 41. Dichter, G. S., Damiano, C. A. & Allen, J. A. Reward circuitry dysfunction in  
12 psychiatric and neurodevelopmental disorders and genetic syndromes: Animal  
13 models and clinical findings. *Journal of Neurodevelopmental Disorders* vol. 4  
14 19 (2012).
- 15 42. Shibasaki, K., Suzuki, M., Mizuno, A. & Tominaga, M. Effects of body  
16 temperature on neural activity in the hippocampus: Regulation of resting  
17 membrane potentials by transient receptor potential vanilloid 4. *J. Neurosci.*  
18 **27**, 1566–1575 (2007).
- 19 43. Shen, J. *et al.* TRPV4 channels stimulate Ca<sup>2+</sup>-induced Ca<sup>2+</sup> release in  
20 mouse neurons and trigger endoplasmic reticulum stress after intracerebral  
21 hemorrhage. *Brain Res. Bull.* **146**, 143–152 (2019).
- 22 44. Dunn, K. M., Hill-Eubanks, D. C., Liedtke, W. B. & Nelson, M. T. TRPV4  
23 channels stimulate Ca<sup>2+</sup>-induced Ca<sup>2+</sup> release in astrocytic endfeet and  
24 amplify neurovascular coupling responses. *Proc. Natl. Acad. Sci. U. S. A.* **110**,  
25 6157–6162 (2013).
- 26 45. Jie, P. *et al.* Activation of Transient Receptor Potential Vanilloid 4 is Involved in  
27 Neuronal Injury in Middle Cerebral Artery Occlusion in Mice. *Mol. Neurobiol.*  
28 **53**, 8–17 (2016).
- 29 46. Peça, J., Ting, J. & Feng, G. SnapShot: Autism and the synapse. *Cell* vol. 147  
30 (2011).
- 31 47. Guang, S. *et al.* Synaptopathology involved in autism spectrum disorder.  
32 *Frontiers in Cellular Neuroscience* vol. 12 (2018).

- 1 48. Zimmerman, A. W., Heuer, L., Ashwood, P. & Van de Water, J. The Immune  
2 System in Autism. in *Autism* 271–288 (Humana Press, 2008).  
3 doi:10.1007/978-1-60327-489-0\_12.
- 4 49. Zimmerman, A. W., Pessah, I. N. & Lein, P. J. Evidence for Environmental  
5 Susceptibility in Autism. in *Autism* 409–428 (Humana Press, 2008).  
6 doi:10.1007/978-1-60327-489-0\_19.
- 7 50. Pessah, I. N. *et al.* Immunologic and neurodevelopmental susceptibilities of  
8 autism. *Neurotoxicology* **29**, 532–545 (2008).
- 9 51. Korvatska, E., Van de Water, J., Anders, T. F. & Gershwin, M. E. Genetic and  
10 immunologic considerations in autism. *Neurobiology of Disease* vol. 9 107–125  
11 (2002).
- 12 52. Landrigan, P. J. *What causes autism? Exploring the environmental*  
13 *contribution. Current Opinion in Pediatrics* vol. 22 219–225 (2010).
- 14 53. Dietert, R. R., Dietert, J. M. & DeWitt, J. C. Environmental risk factors for  
15 autism. *Emerging Health Threats Journal* vol. 4 7111 (2011).
- 16 54. Tian, L., Ma, L., Kaarela, T. & Li, Z. Neuroimmune crosstalk in the central  
17 nervous system and its significance for neurological diseases. *Journal of*  
18 *Neuroinflammation* vol. 9 (2012).
- 19 55. Meyer, U., Feldon, J. & Dammann, O. Schizophrenia and autism: Both shared  
20 and disorder-specific pathogenesis via perinatal inflammation? *Pediatr. Res.*  
21 **69**, 26R-33R (2011).
- 22 56. Pardo, C. A., Vargas, D. L. & Zimmerman, A. W. Immunity, neuroglia and  
23 neuroinflammation in autism. *Int. Rev. Psychiatry* **17**, 485–95 (2005).
- 24 57. Masi, A. *et al.* Cytokine levels and associations with symptom severity in male  
25 and female children with autism spectrum disorder. *Mol. Autism* **8**, 63 (2017).
- 26 58. Masi, A., Glozier, N., Dale, R. & Guastella, A. J. The Immune System,  
27 Cytokines, and Biomarkers in Autism Spectrum Disorder. *Neuroscience*  
28 *Bulletin* vol. 33 194–204 (2017).
- 29 59. Gupta, S. *et al.* Transcriptome analysis reveals dysregulation of innate immune  
30 response genes and neuronal activity-dependent genes in autism. *Nat.*  
31 *Commun.* **5**, 1–8 (2014).
- 32 60. Yamashita, Y., Fujimoto, C., Nakajima, E., Isagai, T. & Matsuishi, T. Possible

- 1 association between congenital cytomegalovirus infection and autistic disorder.  
2 *J. Autism Dev. Disord.* **33**, 455–459 (2003).
- 3 61. Patterson, P. H. Maternal infection: Window on neuroimmune interactions in  
4 fetal brain development and mental illness. *Current Opinion in Neurobiology*  
5 vol. 12 115–118 (2002).
- 6 62. Shi, L., Fatemi, S. H., Sidwell, R. W. & Patterson, P. H. Maternal influenza  
7 infection causes marked behavioral and pharmacological changes in the  
8 offspring. *J. Neurosci.* **23**, 297–302 (2003).
- 9 63. Larson, S. J. Behavioral and motivational effects of immune-system activation.  
10 *J. Gen. Psychol.* **129**, 401–414 (2002).
- 11 64. Aubert, A., Kelley, K. W. & Dantzer, R. Differential effect of lipopolysaccharide  
12 on food hoarding behavior and food consumption in rats. *Brain. Behav. Immun.*  
13 **11**, 229–238 (1997).
- 14 65. Aubert, A., Goodall, G., Dantzer, R. & Gheusi, G. Differential effects of  
15 lipopolysaccharide on pup retrieving and nest building in lactating mice. *Brain.*  
16 *Behav. Immun.* **11**, 107–118 (1997).
- 17 66. Larson, S. J., Romanoff, R. L., Dunn, A. J. & Glowa, J. R. Effects of  
18 interleukin-1<sup>2</sup> on food-maintained behavior in the mouse. *Brain. Behav.*  
19 *Immun.* **16**, 398–410 (2002).
- 20 67. Fishkin, R. J. & Winslow, J. T. Endotoxin-induced reduction of social  
21 investigation by mice: Interaction with amphetamine and anti-inflammatory  
22 drugs. *Psychopharmacology (Berl)*. **132**, 335–341 (1997).
- 23 68. Dantzer, R. Cytokine-induced sickness behavior: Where do we stand? *Brain.*  
24 *Behav. Immun.* **15**, 7–24 (2001).
- 25 69. Felger, J. C. & Treadway, M. T. Inflammation Effects on Motivation and Motor  
26 Activity: Role of Dopamine. *Neuropsychopharmacol. Rev. Adv. online Publ.* **42**,  
27 216–241 (2017).
- 28 70. Bluthé, R. M. *et al.* Synergy between tumor necrosis factor  $\alpha$  and interleukin-1  
29 in the induction of sickness behavior in mice. *Psychoneuroendocrinology* **19**,  
30 197–207 (1994).
- 31 71. Bluthé, R. M., Dantzer, R. & Kelley, K. W. Effects of interleukin-1 receptor  
32 antagonist on the behavioral effects of lipopolysaccharide in rat. *Brain Res.*

- 1           **573**, 318–320 (1992).
- 2   72.   Everaerts, W., Nilius, B. & Owsianik, G. The vanilloid transient receptor  
3           potential channel TRPV4: From structure to disease. *Progress in Biophysics*  
4           *and Molecular Biology* vol. 103 2–17 (2010).
- 5   73.   Güler, A. D. *et al.* Heat-evoked activation of the ion channel, TRPV4. *J.*  
6           *Neurosci.* **22**, 6408–6414 (2002).
- 7   74.   Bakthavatchalam, R. & Kimball, S. D. *Modulators of Transient Receptor*  
8           *Potential Ion Channels. Annual Reports in Medicinal Chemistry* vol. 45  
9           (Academic Press, 2010).
- 10 75.   Nilius, B. & Owsianik, G. Channelopathies converge on TRPV4. *Nature*  
11           *Genetics* vol. 42 98–100 (2010).
- 12 76.   Kauer, J. A. & Gibson, H. E. Hot flash: TRPV channels in the brain. *Trends in*  
13           *Neurosciences* vol. 32 215–224 (2009).
- 14 77.   Yuen, R. K. C. *et al.* Whole-genome sequencing of quartet families with autism  
15           spectrum disorder. *Nat. Med.* **21**, 185–191 (2015).
- 16 78.   Alessandri-Haber, N., Joseph, E., Dina, O. A., Liedtke, W. & Levine, J. D.  
17           TRPV4 mediates pain-related behavior induced by mild hypertonic stimuli in  
18           the presence of inflammatory mediator. *Pain* **118**, 70–79 (2005).
- 19 79.   Wang, J., Wang, X.-W., Zhang, Y., Yin, C.-P. & Yue, S.-W. Ca<sup>2+</sup> influx  
20           mediates the TRPV4–NO pathway in neuropathic hyperalgesia following  
21           chronic compression of the dorsal root ganglion. *Neurosci. Lett.* **588**, 159–165  
22           (2015).
- 23 80.   Wang, Z. *et al.* TRPV4-induced inflammatory response is involved in neuronal  
24           death in pilocarpine model of temporal lobe epilepsy in mice. *Cell Death Dis.*  
25           **10**, 1–10 (2019).
- 26 81.   Levin, S. G. & Godukhin, O. V. Modulating effect of cytokines on mechanisms  
27           of synaptic plasticity in the brain. *Biochemistry (Moscow)* vol. 82 264–274  
28           (2017).
- 29 82.   Vezzani, A. & Viviani, B. Neuromodulatory properties of inflammatory  
30           cytokines and their impact on neuronal excitability. *Neuropharmacology* vol. 96  
31           70–82 (2015).
- 32 83.   Moy, S. S. *et al.* Mouse behavioral tasks relevant to autism: Phenotypes of 10

- 1 inbred strains. *Behav. Brain Res.* **176**, 4–20 (2007).
- 2 84. Livak, K. J. & Schmittgen, T. D. Analysis of relative gene expression data  
3 using real-time quantitative PCR and the 2- $\Delta\Delta$ CT method. *Methods* **25**, 402–  
4 408 (2001).
- 5 85. Dobin, A. *et al.* STAR: Ultrafast universal RNA-seq aligner. *Bioinformatics* **29**,  
6 15–21 (2013).
- 7 86. Anders, S., Pyl, P. T. & Huber, W. HTSeq-A Python framework to work with  
8 high-throughput sequencing data. *Bioinformatics* **31**, 166–169 (2015).
- 9 87. Eden, E., Navon, R., Steinfeld, I., Lipson, D. & Yakhini, Z. GOrilla: A tool for  
10 discovery and visualization of enriched GO terms in ranked gene lists. *BMC*  
11 *Bioinformatics* **10**, (2009).
- 12 88. Supek, F., Bošnjak, M., Škunca, N. & Šmuc, T. Revigo summarizes and  
13 visualizes long lists of gene ontology terms. *PLoS One* **6**, (2011).
- 14 89. Love, M. I., Huber, W. & Anders, S. Moderated estimation of fold change and  
15 dispersion for RNA-seq data with DESeq2. *Genome Biol.* **15**, (2014).
- 16 90. Wickham, H. Reshaping Data with the **reshape** Package. *J. Stat. Softw.* **21**,  
17 (2007).
- 18 91. Wickham, H. ggplot2: Elegant Graphics for Data Analysis. *Journeal Stat.*  
19 *Softw.* **80**, 1–4 (2017).
- 20 92. McCarthy, D. J., Campbell, K. R., Lun, A. T. L. & Wills, Q. F. Scater: Pre-  
21 processing, quality control, normalization and visualization of single-cell RNA-  
22 seq data in R. *Bioinformatics* (2017) doi:10.1093/bioinformatics/btw777.
- 23 93. Ignatiadis, N., Klaus, B., Zaugg, J. B. & Huber, W. Data-driven hypothesis  
24 weighting increases detection power in genome-scale multiple testing. *Nat.*  
25 *Methods* (2016) doi:10.1038/nmeth.3885.
- 26



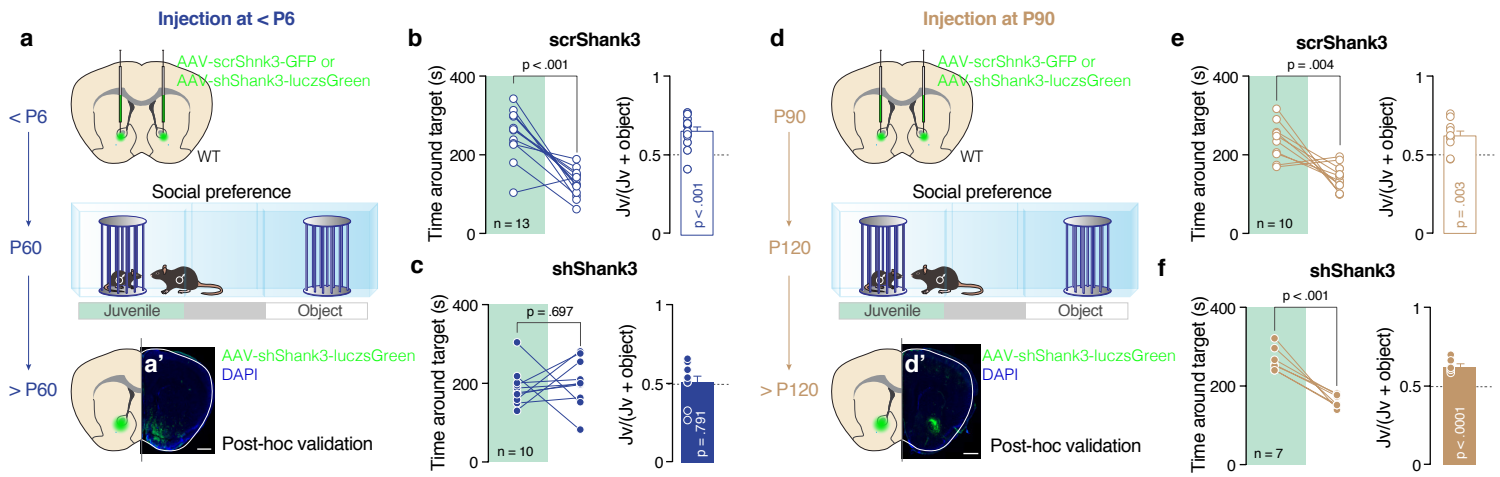

Figure 1 - Tzanoulinou, Musardo, Contestabile et al

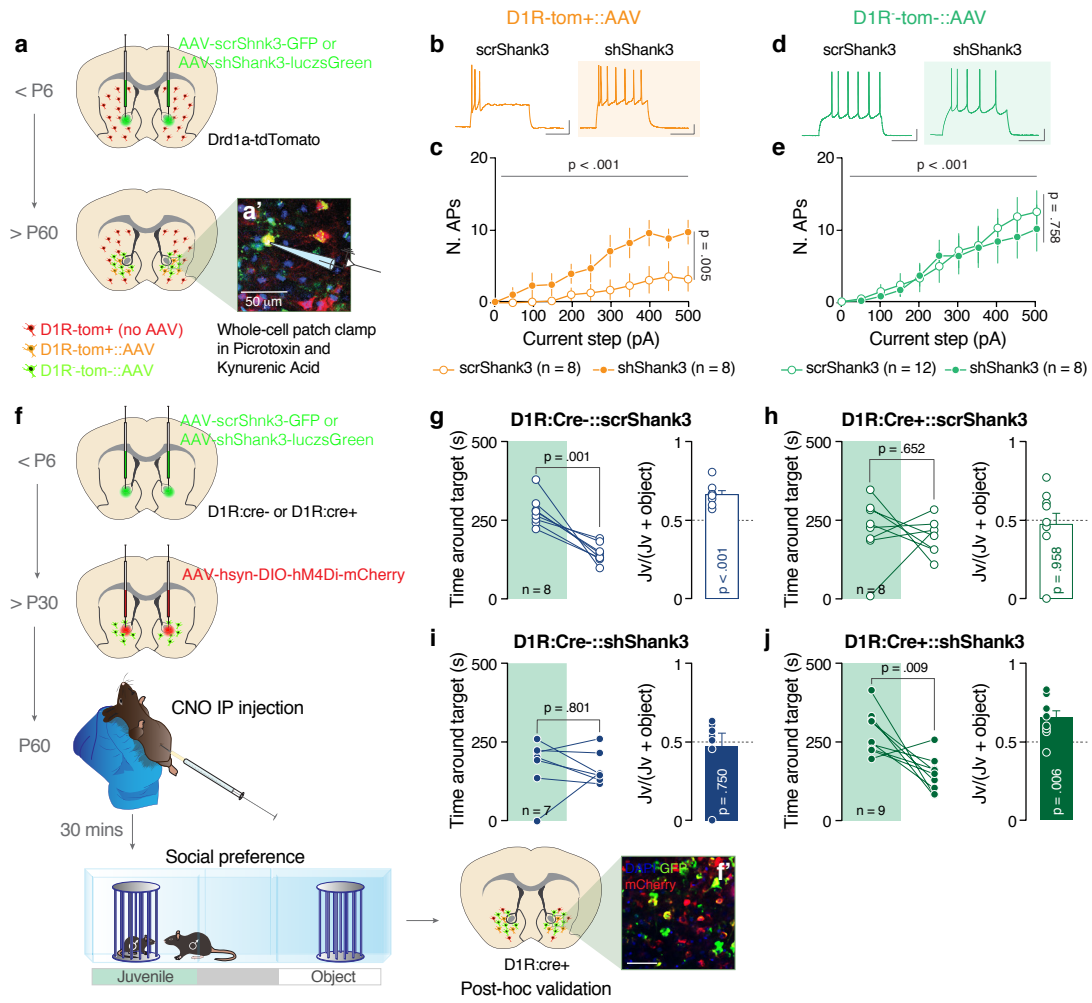

Figure 2 - Tzanoulinou, Musardo, Contestabile et al

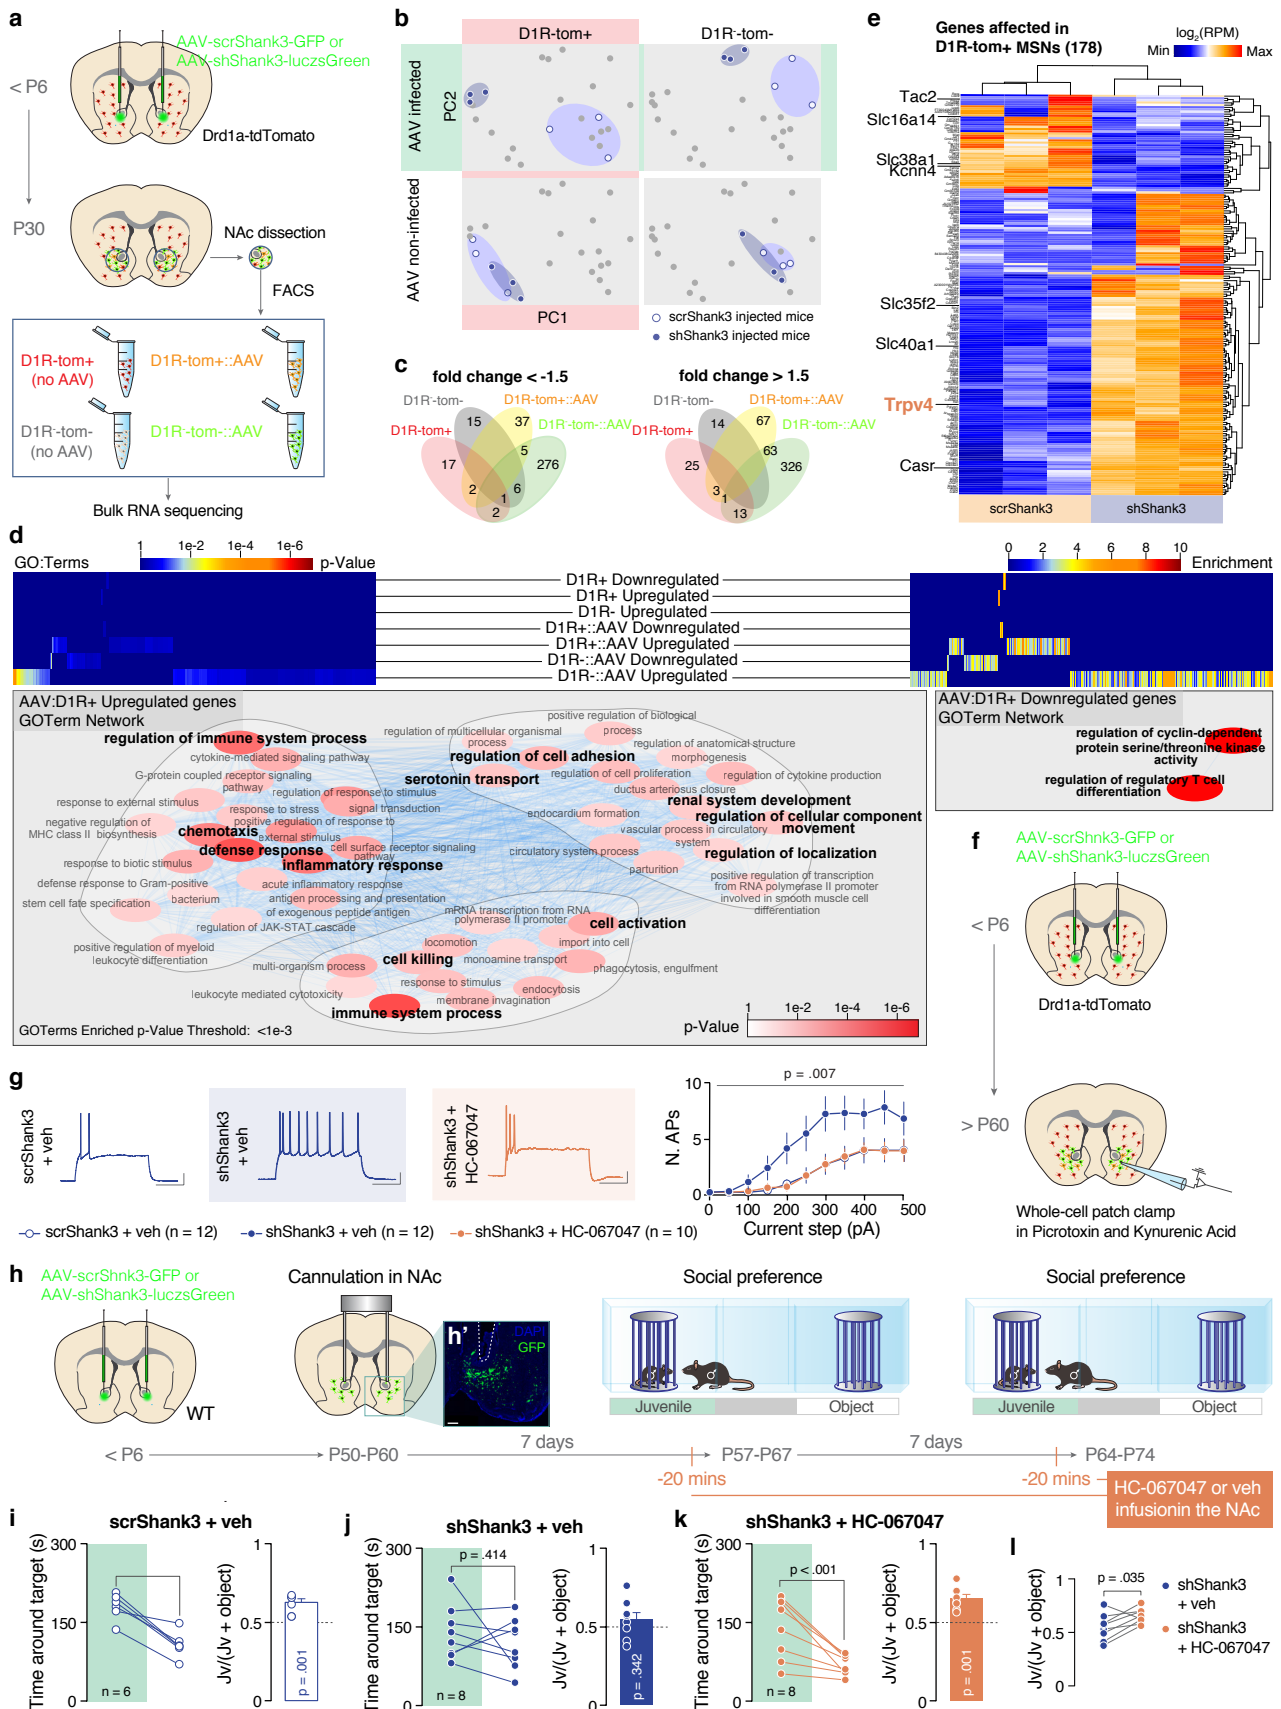

Figure 3 - Tzanoulinou, Musardo, Contestabile et al

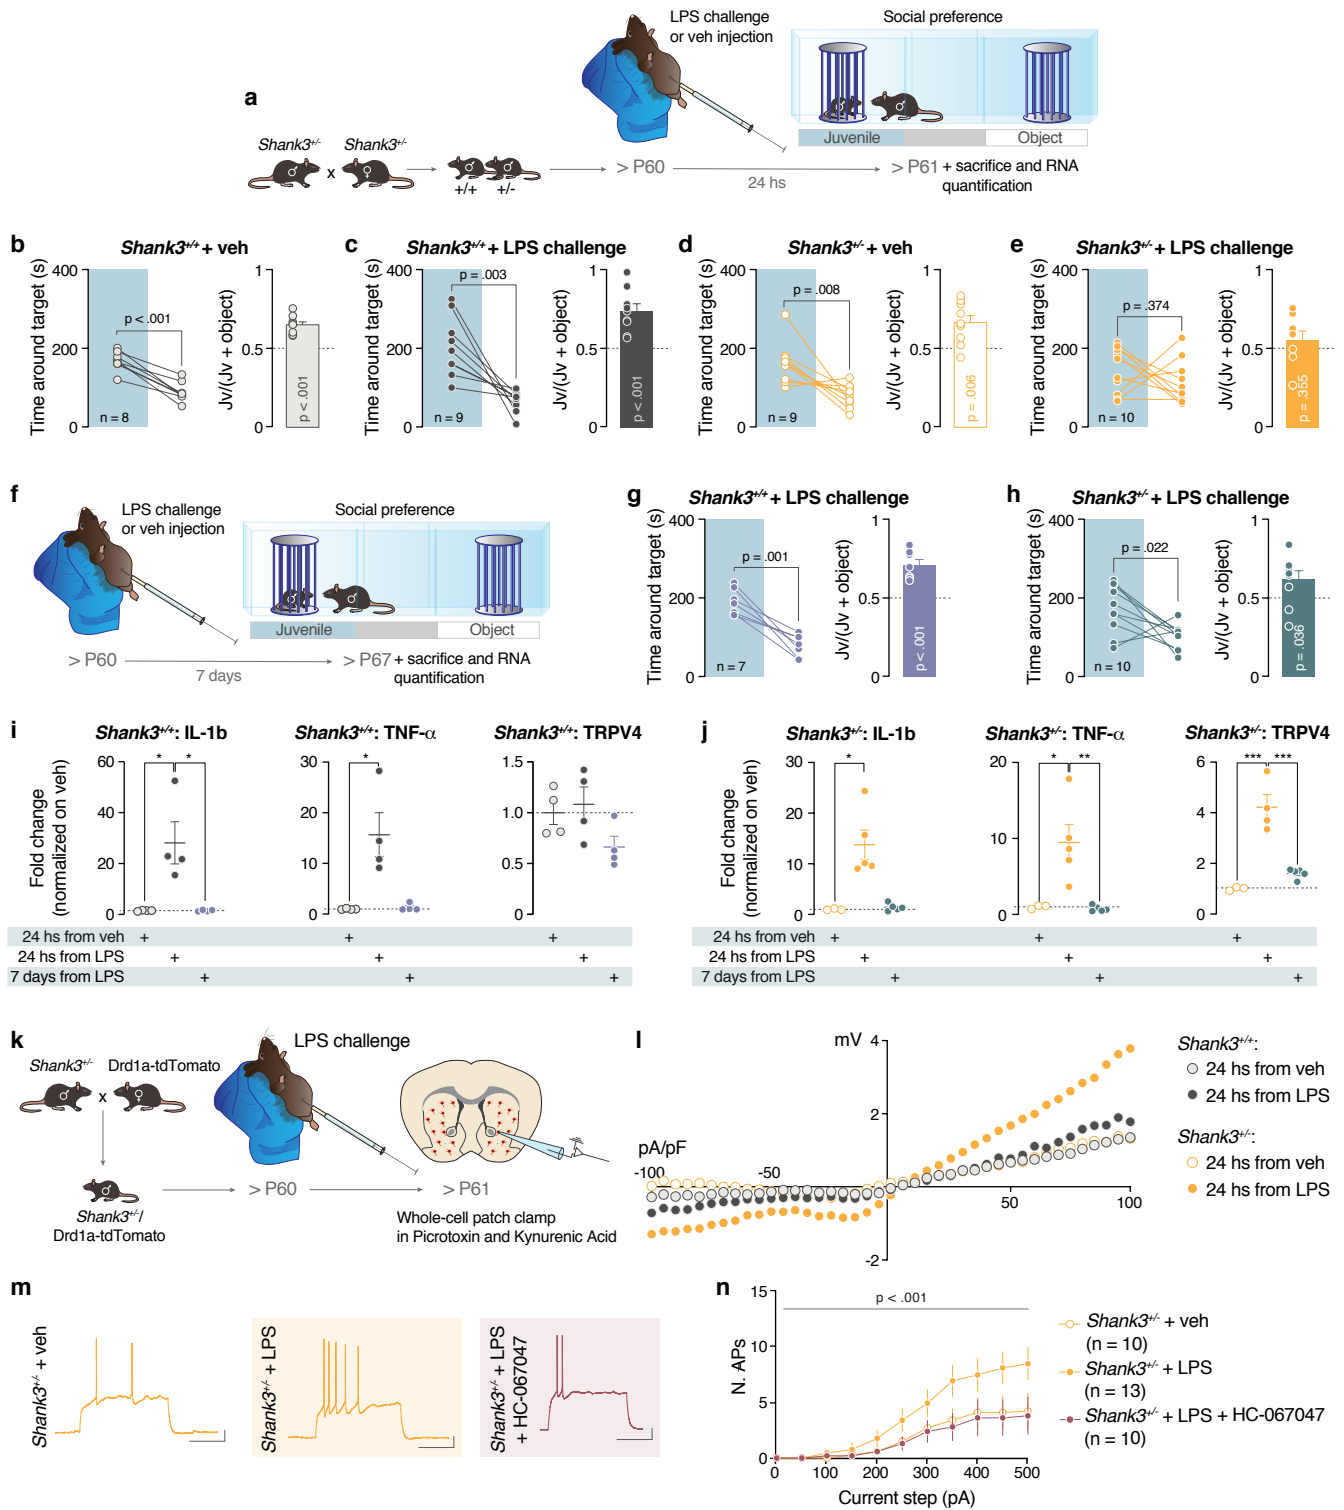

Figure 4 - Tzanoulinou, Musardo, Contestabile et al

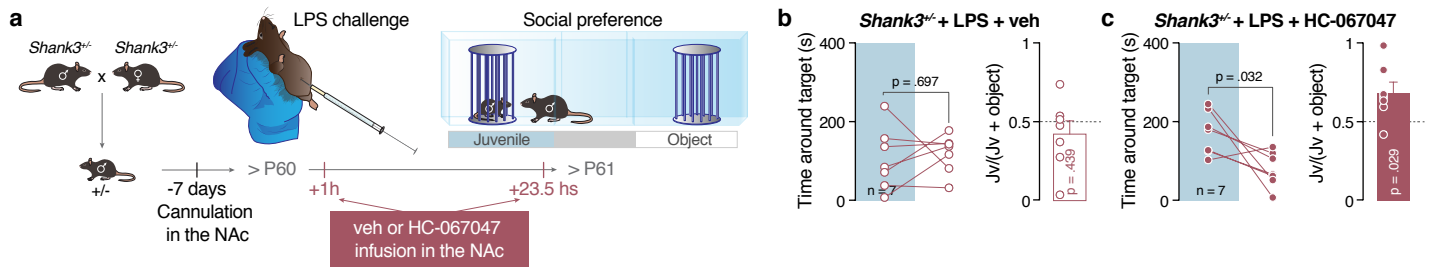

Figure 5 - Tzanoulinou, Musardo, Contestabile et al

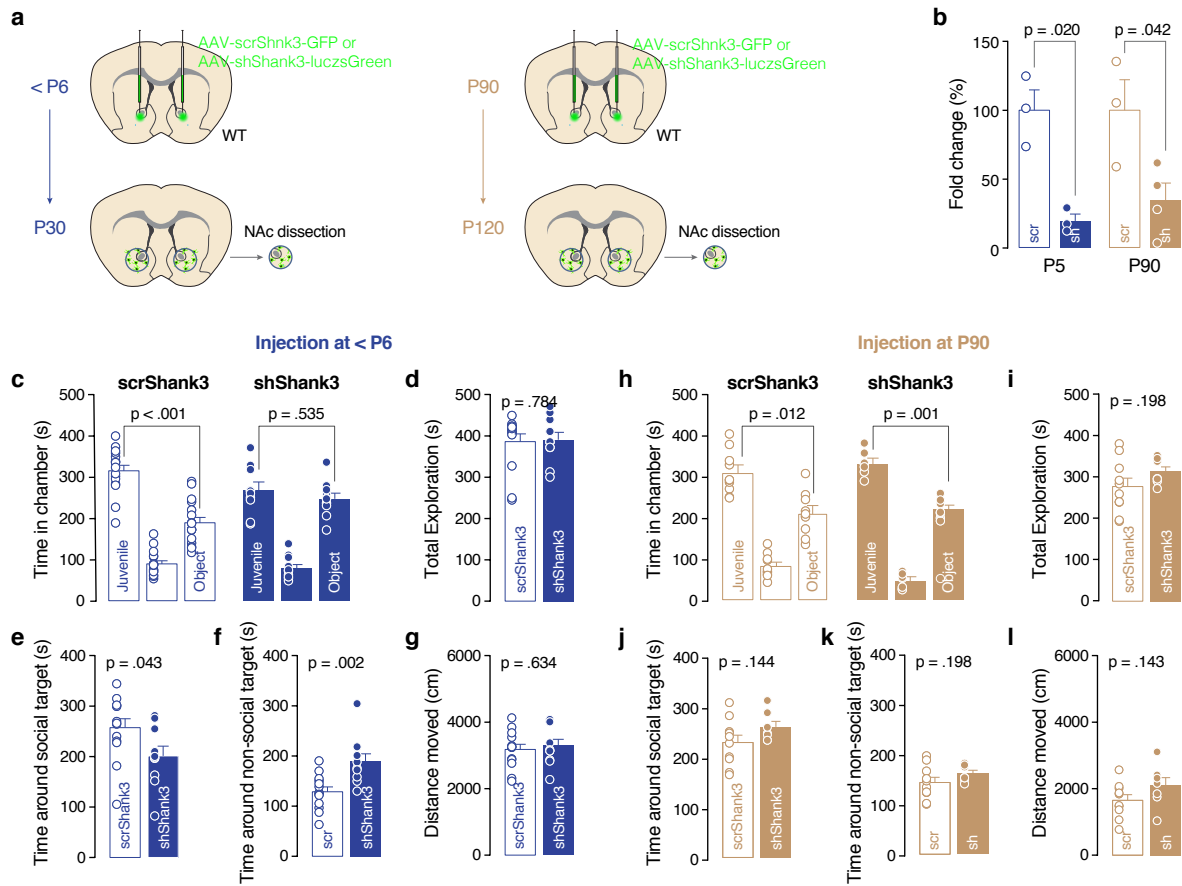

Sup. Figure 1 - Tzanoulinou, Musardo, Contestabile et al

### Whole-cell patch clamp in Picrotoxin and Kynurenic Acid

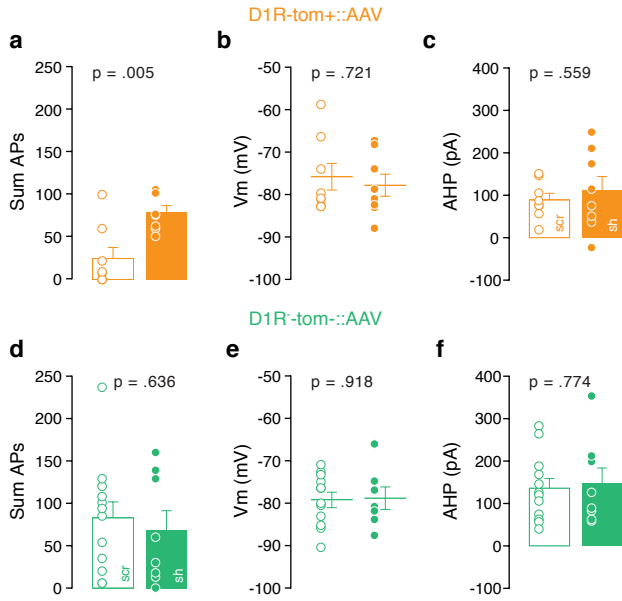

### Whole-cell patch clamp in aCSF

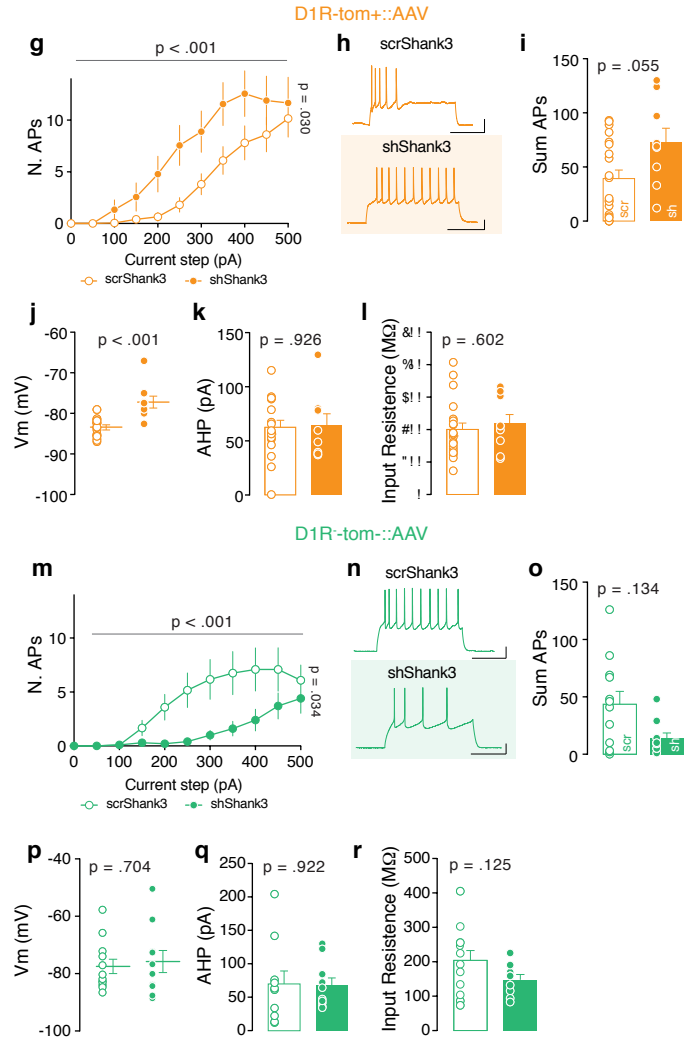

Sup. Figure 2 - Tzanoulinou, Musardo, Contestabile et al

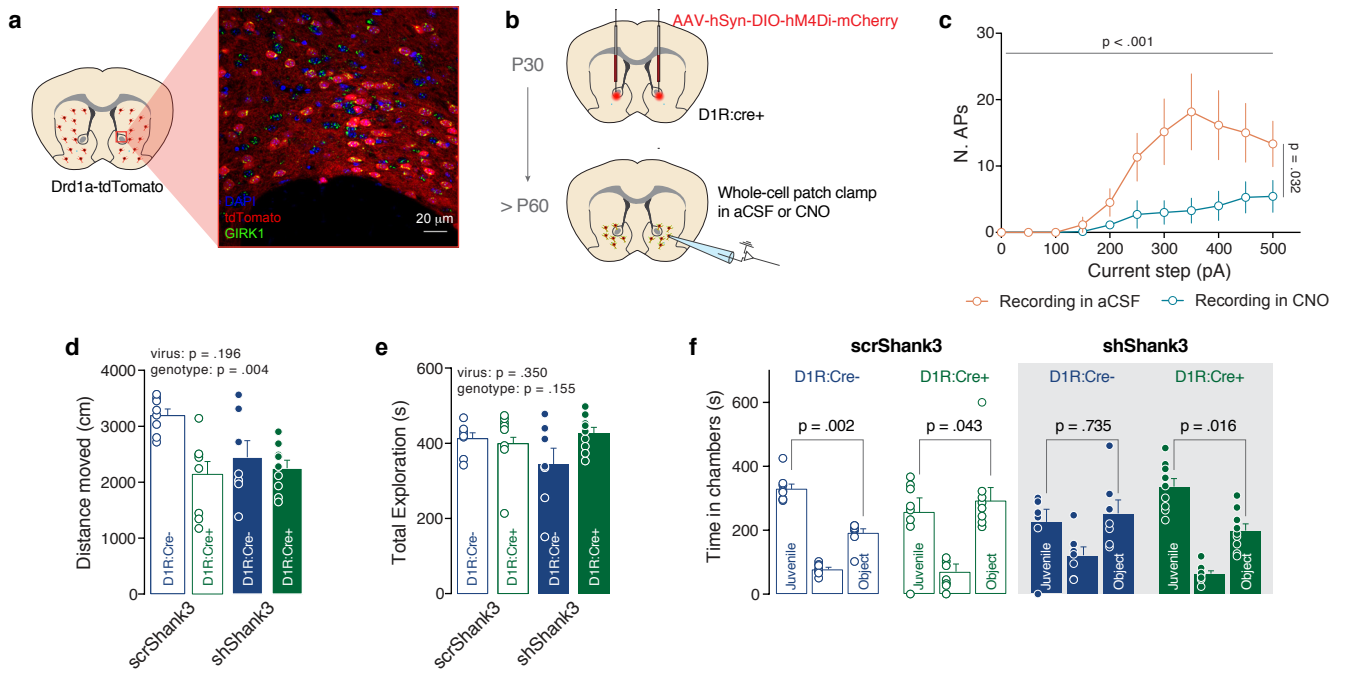

Sup. Figure 3 - Tzanoulinou, Musardo, Contestabile et al



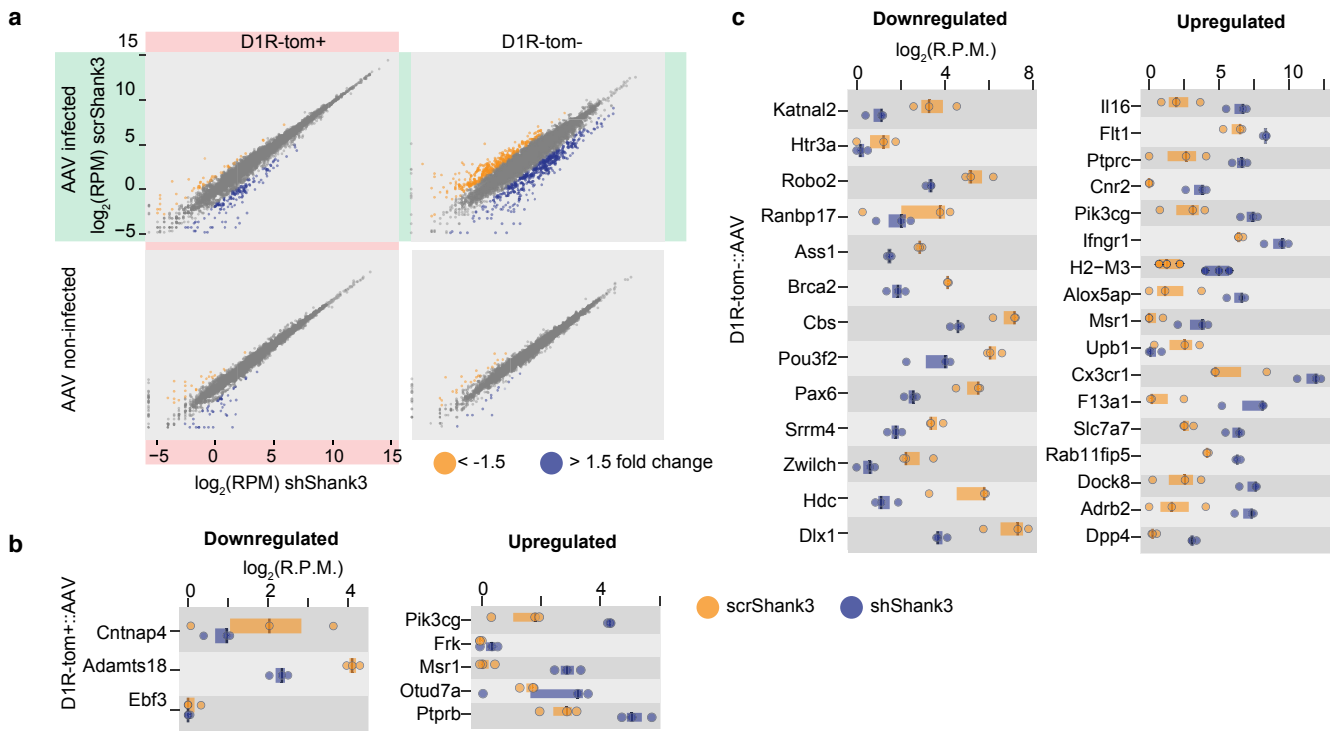

Sup. Figure 4 - Tzanoulinou, Musardo, Contestabile et al

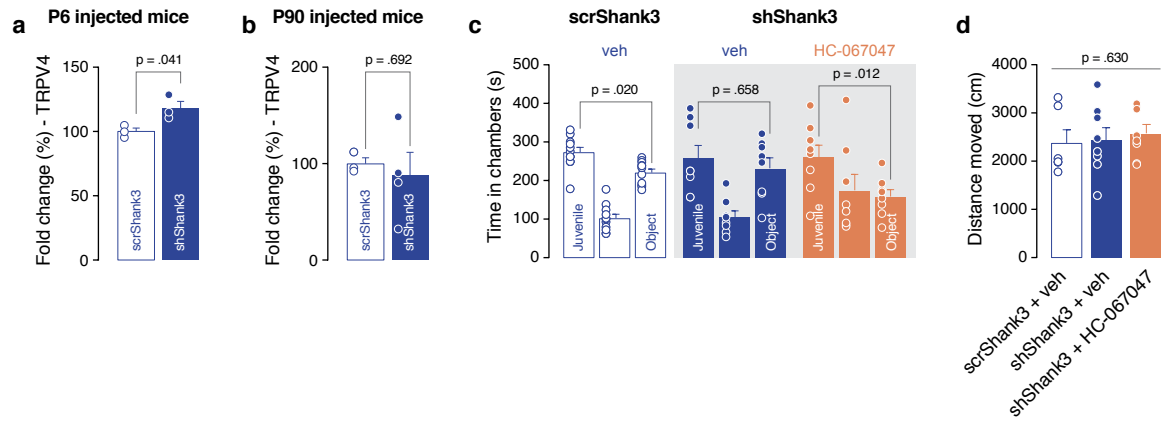

Sup. Figure 5 - Tzanoulinou, Musardo, Contestabile et al

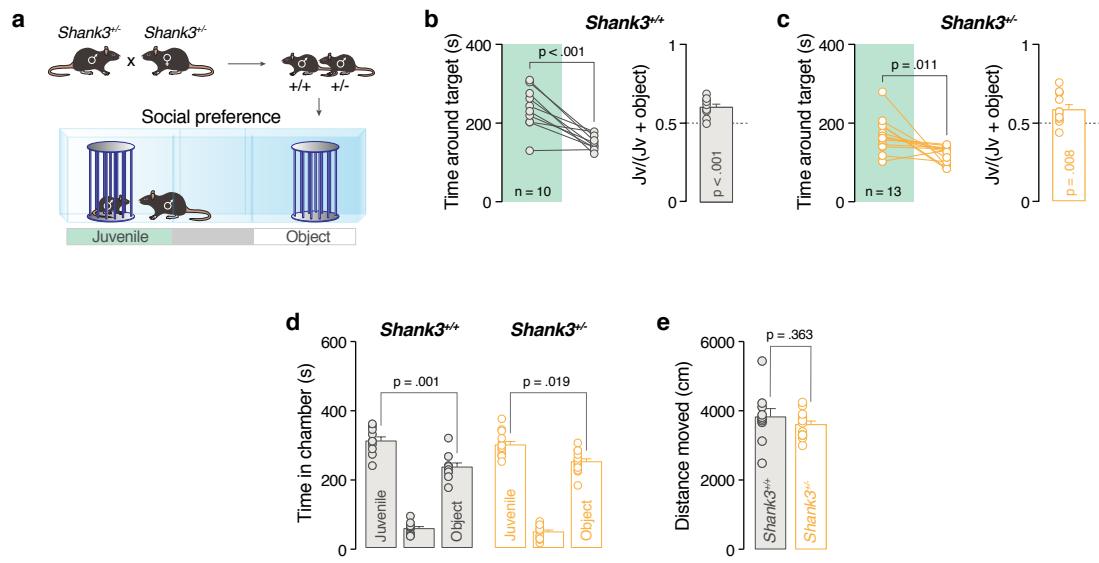

Sup. Figure 6 - Tzanoulinou, Musardo, Contestabile et al

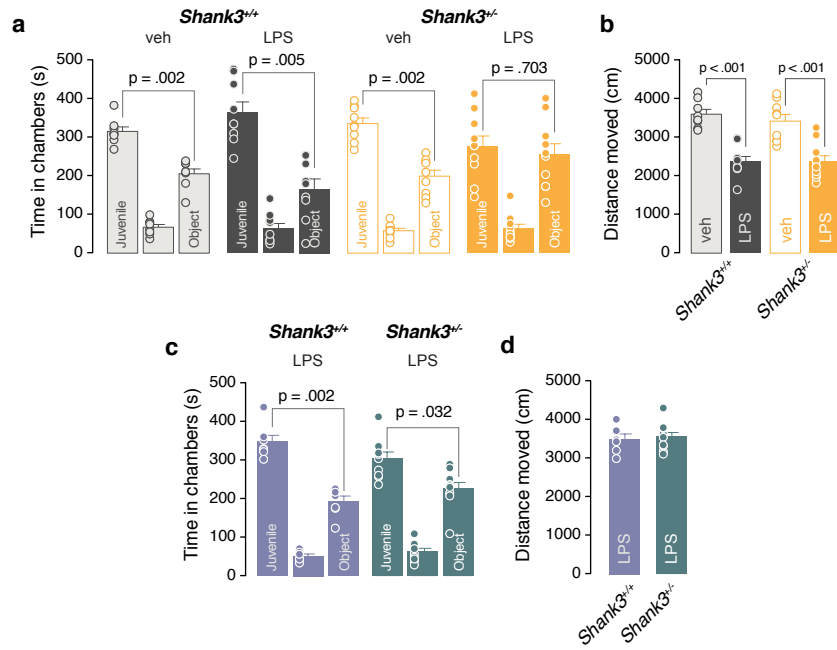

Sup. Figure 7 - Tzanoulinou, Musardo, Contestabile et al

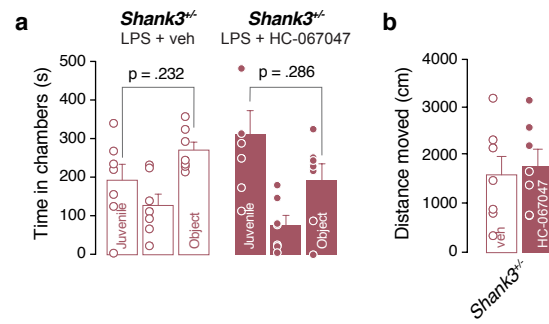

Sup. Figure 8 - Tzanoulinou, Musardo, Contestabile et al
